1 ***In silico* modeling and simulation of neuroendocrine-immune modulation through**  
2 **adrenergic and 17 $\beta$ -estradiol receptors in lymphocytes show differential activation of cyclic**  
3 **adenosine monophosphate (cAMP)**

4 Priyanka, H. P<sup>1</sup>., Thiagaraj, A. <sup>2</sup>, Krithika, G.<sup>3</sup>, Hima, L.<sup>1</sup>, Hopper, W. <sup>2</sup>, ThyagaRajan, S. <sup>1</sup>

5 <sup>1</sup>Integrative Medicine Laboratory, Department of Biotechnology, School of Bioengineering,

6 SRM University, Kattankulathur 603203, India; <sup>2</sup>Department of Bioinformatics, School of

7 Bioengineering, SRM University, Kattankulathur 603203, India; <sup>3</sup>Centre of Advanced Study in

8 Crystallography and Biophysics, University of Madras Guindy Campus, Chennai 600025, India

9

10 <sup>1</sup>Corresponding author: Hannah P. Priyanka,  
11 Institute of Advanced Research in Health Sciences  
12 Tamil Nadu Government Multi Super Speciality Hospital  
13 Omandurar Government Estate  
14 Chennai 600002  
15 Tamil Nadu, INDIA  
16 Email: hannahpriyanka@gmail.com  
17 Phone: 91-9841883355

18 **Keywords:**

19 Immunomodulation, T-cell, norepinephrine, 17 $\beta$ -estradiol, p-ERK, IFN- $\gamma$

20 **Word Count:** 5039 Words

21 **Running Head:**

22 Estrogen and adrenergic signaling in silico

23

## 24 **Abstract**

25 Sympathetic innervation of lymphoid organs and presence of  $17\beta$ -estradiol and adrenergic  
26 receptors (ARs) on lymphocytes suggests that sympathetic stimulation and hormonal activation  
27 may influence immune functions. Simulation of these pathways may help to understand the  
28 dynamics of neuroendocrine-immune modulation at the cellular and molecular level.

29 Dose- and receptor-dependent effects of  $17\beta$ -estradiol and AR sub-type-specific agonists  
30 were established in vitro on lymphocytes from young male Sprague-Dawley rats and modeled in  
31 silico using MATLAB Simbiology toolbox. Kinetic principles were assigned to define receptor-  
32 ligand dynamics and state/time plots were obtained using Ode15s solvers at different time intervals  
33 for key regulatory molecules. Comparisons were drawn between in silico and in vitro data for  
34 validating the constructed model with sensitivity analysis of key regulatory molecules to assess  
35 their individual impacts on the dynamics of the system. Finally docking studies were conducted  
36 with key ligands  $17\beta$ -estradiol and norepinephrine to understand the mechanistic principles  
37 underlying their interactions.

38 Adrenergic activation triggered pro-apoptotic signals while  $17\beta$ -estradiol enhanced  
39 survival signals showing contradictory effects as observed in vitro. Treatment of lymphocytes with  
40  $17\beta$ -estradiol shows ten-fold increase in survival signals concentration-dependently manner.  
41 cAMP activation is crucial for the activation of survival signals through p-ERK (Extracellular  
42 Signal-Regulated Kinase) and p-CREB (cAMP Responsive Element Binding (protein). Inhibition  
43 of p-ERK by norepinephrine and  $\beta$ 2-AR by  $17\beta$ -estradiol indicate direct influence on the down-  
44 stream signals altering apoptotic v/s survival signals.

45 Thus, the cross-talk between  $17\beta$ -estradiol and adrenergic signaling pathways determines  
46 lymphocyte functions in a receptor subtype- and co-activation-dependent manner in health and  
47 disease.

## 48 **1.0 Introduction**

49 The neuroendocrine-immune network is a complex inter-regulatory system with wide  
50 plasticity in order to maintain systemic homeostasis [1-3]. In females, the cyclic fluctuations in  
51 the levels of gonadal hormones especially,  $17\beta$ -estradiol affect the functioning of immune effector  
52 cells by binding to specific receptors [4-7].

53 In the periphery, *in vitro* and *in vivo*  $17\beta$ -estradiol-stimulation has been shown to enhance  
54 splenocyte proliferation and cytokine production through the alteration of specific signaling  
55 molecules [2, 4, 8]. In the resting state, the close apposition of T-lymphocytes in direct synaptic  
56 association with sympathetic noradrenergic (NA) nerve fibers that innervate the lymphoid organs  
57 renders them highly responsive to norepinephrine [NE; 7, 9-13]. Since both  $17\beta$ -estradiol and NE  
58 mediate their effects on lymphocytes through their specific receptors, their down-stream effects  
59 are dependent upon the kinetic parameters that govern receptor-ligand interactions [10, 14-16].  
60 Previous studies from our laboratory and others have shown that both  $17\beta$ -estradiol and  
61 norepinephrine-induced signaling cascades involve similar signaling molecules (p-ERK, p-CREB,  
62 cAMP and p-Akt) in modulating the expression of similar cytokines (IFN- $\gamma$  and IL-2) thereby,  
63 altering cell-mediated immune functions [2, 4, 17-18]. Thus, the scope of cross-talk between the  
64 two pathways during multiple ligand-receptor interactions is infinite. Considering that NE can bind  
65 to  $\alpha 1$ -/ $\alpha 2$ - or  $\beta 1$ -/ $\beta 2$ -/ $\beta 3$ - adrenoceptors (AR) on lymphocytes and  $17\beta$ -estradiol can bind to  
66 cytosolic (cERs) or nuclear (nERs)  $17\beta$ -estradiol receptors and initiate signals that target similar  
67 down-stream signaling molecules, the underlying kinetic parameters will influence the outcome of

68 the cross-talk through synergistic, additive or diminutive effects. Hence in this study, we have  
69 created a dynamic model of resting lymphocyte functions in the presence of  $17\beta$ -estradiol and/or  
70 NE using kinetic principles that govern receptor-ligand activation from secondary data with  
71 concentration and down-stream signaling data from *in vitro* studies published from our laboratory.  
72 Also, in an attempt to understand the multiple levels of interactions between these two pathways,  
73 we have also conducted docking studies of  $17\beta$ -estradiol with the  $\beta$ 2-AR and NE with the key  
74 signaling molecule in  $17\beta$ -estradiol signaling cascade p-ERK.

## 75 **2.0 Methods**

### 76 **2.1 Model building**

77 The model was built using both primary and secondary data sources. The dose- and  
78 receptor-dependent effects of  $17\beta$ -estradiol and AR sub-type-specific agonists were established *in*  
79 *vitro* on lymphocytes from young male Sprague-Dawley rats in previous studies published by our  
80 laboratory [17,18]. In these studies, the concentration of the signaling molecules, cytokines, and  
81 other secondary molecules was determined using ELISA and this data was used to construct the  
82 model (Tables 1, 2). The possible cross-talk pathway was mapped using receptor-specific  
83 inhibitors and inhibitors of signal transduction molecules and was modeled *in silico* using  
84 MATLAB Simbiology toolbox. Receptor-ligand dynamics were defined based on kinetic  
85 principles from available literature and previous studies from our laboratory. State versus time  
86 plots were obtained using Ode15s solvers at 1ns-1s time intervals in accordance with  
87 neurotransmitter kinetics and at 24-72 hrs for long-term effects on lymphocyte functions.  
88 Comparisons were drawn between *in silico* and *in vitro* data for validating the constructed model.  
89 Sensitivity analysis was performed on key regulatory molecules to assess their individual impacts  
90 on the dynamics of the system.

91 2.1.1 Model

92 The model was built to show an interconnected network of four signaling pathways on the  
93 basis of in vitro studies conducted in our laboratory including:

- 94 1.  $\alpha$ 1-adrenoceptor signaling [17]; (Table 1A)
- 95 2.  $\alpha$ 2-adrenoceptor signaling [17]; (Table 1B)
- 96 3.  $\beta$ 2-adrenoceptor signaling [18]; (Table 1C)
- 97 4. 17 $\beta$ -estradiol signaling through ERs and GPCRs [4]; (Table 1D) and their respective  
98 kinetic parameters outlined in Table 2.

99 **Table 1:** Reaction table and kinetics for  $\alpha$ 1-adrenoceptor signaling (1A),  $\alpha$ 2-adrenoceptor  
100 signaling (1B),  $\beta$ 2-adrenoceptor signaling (1C) and 17 $\beta$ -estradiol signaling through ERs and  
101 GPCRs (1D).

102 **1A**

| S.No | Reaction                                 | Kinetics                                |
|------|------------------------------------------|-----------------------------------------|
| 1    | [AR- $\alpha$ 1]+[Phenylephrine]==>[RL1] | vm*[Phenylephrine]/(km+[Phenylephrine]) |
| 2    | [CREB]+[RL1]==>[p-CREB]                  | nkn.[CREB].[RL1]                        |
| 3    | [p-CREB]+[CBP]==>[CBP-CREB]              | ct.[p-CREB].[CBP]                       |
| 4    | [CBP]-[p-CREB]+[DNA]==>[mRNA1]+[mRNA2]   | tr.[CBP-p-CREB].[DNA]                   |
| 5    | [mRNA1]==>[survival signal]              | as.[mRNA`1]                             |

103 **1B**

| S.No | Reaction                             | Kinetics                        |
|------|--------------------------------------|---------------------------------|
| 1    | [AR- $\alpha$ 2]+[Clonidine]==>[RL2] | va*[Clonidine]/(kn+[Clonidine]) |
| 2    | [pi3k*]+[Akt]+[RL2]==>[p-Akt]        | at.[pi3k*].[Akt].[RL2]          |
| 3    | [RL2]+[PKA*]==>[PKA]                 | ml.[RL2].[PKA*]                 |
| 4    | [p-Akt]+[BCL2]==>[BCL2*]             | bc.[p-Akt].[BCL2]               |
| 5    | [BCL2*]==>[survival signal]          | aps.[BCL2*]                     |

104 **1C**

| S.No | Reaction                               | Kinetics                             |
|------|----------------------------------------|--------------------------------------|
| 1    | [ $\beta$ 2-AR]+[Terbutaline]==>[RL3]  | bt.[Terbutaline]/(kbt+[Terbutaline]) |
| 2    | [RL3]+[PKA]==>[PKA*]                   | gh.[RL3].[PKA]                       |
| 3    | [RL3]+[pi3k]==>[pi3k*]                 | jk.[RL3].[pi3k]                      |
| 4    | [PKA*]+[ERK]==>[p-ERK]                 | fd.[PKA*].[ERK]                      |
| 5    | [p-ERK]+[CREB]==>[p-CREB]+[ERK]        | pe.[p-ERK].[CREB]                    |
| 6    | [p-CREB]+[CBP]==>[CBP-CREB]            | ct.[p-CREB].[CBP]                    |
| 7    | [CBP]-[p-CREB]+[DNA]==>[mRNA1]+[mRNA2] | tr.[CBP-p-CREB].[DNA]                |
| 8    | [p-Akt]+[DNA]==>[mRNA2-1-1]            | kj.[p-Akt].[DNA]                     |

|    |                                  |                         |
|----|----------------------------------|-------------------------|
| 9  | [mRNA2-1-1]=>[iNOS]              | hg.[mRNA2-1-1]          |
| 10 | L-Arg+iNOS=>NO                   | hg.L-Arg/(fd+[L-Arg])   |
| 11 | [NO]+[CAAT]=>[C/EBP]             | vm.[NO].[CAAT]          |
| 12 | [C/EBP]=>[CHOP]                  | cvc.[CAAT]/(kc+[CAAT])  |
| 13 | [DNA]+[CHOP]=>[mRNA2-1]          | vch.[CHOP]/(kch+[CHOP]) |
| 14 | [mRNA2-1]=>[BAX]                 | fbax.[mRNA2-1]          |
| 15 | [BAX]+[BCL2]=>[BCL2-BAX]2`       | vbax.[BAX]/(kbax+[BAX]) |
| 16 | [BCL2-BAX]2=> [Apoptotic signal] | vx.[BCL2-BAX]2          |
| 17 | [DNA]+[p-Akt]=>[mRNA3]           | kj.[DNA].[p-Akt]        |
| 18 | [mRNA3]=>[IL-2]                  | kl.[mRNA3]              |
| 19 | [IL-2]=>[Survival Signal]        | kj.[IL-2]               |

105 **1D**

| S.No | Reaction                                 | Kinetics                                  |
|------|------------------------------------------|-------------------------------------------|
| 1    | [17β-estradiol]+[GPCR]=>[cAMP]           | Vm2.[17β-estradiol]/(Km1+[17β-estradiol]) |
| 2    | [cAMP]+[PKA]=>[PKA*]                     | pk.[cAMP].[PKA]                           |
| 3    | [ER]+[17β-estradiol]=>[E-ER]             | erb.[ER].[17β-estradiol]                  |
| 4    | [E-ER]+[shc-grb2sos]=>[E-ER-shc-grb2sos] | eg.[E-ER].[shc-grb2sos]                   |
| 5    | [E-ER-shcgrb2sos]+[pi3k]=>[pi3k*]        | ep.[E-ER-shc-grb2sos].[pi3k]              |
| 6    | [E-ER]+[shc-grb2sos]+[RAS]=>[RAS*]       | era.[E-ER].[shc-grb2sos].[RAS]            |
| 7    | [RAF]+[RAS*]=>[RAF*]                     | kc.RAF*.RAS*                              |
| 8    | [MEK]+[RAF*]=>[MEK-RAF*]                 | mek.[MEK].[RAF*]                          |
| 9    | [MEK-RAF*]=>[MEK-p]+[RAF]                | mekp.[MEK-RAF*]                           |
| 10   | [MEK-p]+[RAF*]=>[MEK-p-RAF*]2            | rm.[MEK-p].[RAF*]                         |
| 11   | [MEK-p-RAF*]2=>[MEK-pp]+[RAF]            | mpp.[MEK-p-RAF*]2                         |
| 12   | [ERK]+[MEK-pp]=>[p-ERK]                  | ka2.[ERK].[MEK-pp]                        |
| 13   | [p-ERK]+[CREB]=>[p-CREB]+[ERK]           | pe.[p-ERK].[CREB]                         |
| 14   | [p-CREB]+[CBP]=>[CBP-CREB]               | ct.[p-CREB].[CBP]                         |
| 15   | [CBP]-[p-CREB]+[DNA]=>[mRNA1]+[mRNA2]    | tr.[CBP-p-CREB].[DNA]                     |
| 16   | [mRNA2]=>[IFN-γ]                         | ifp.[mRNA2]                               |
| 17   | [mRNA2]=>[Survival signal]               | bnb.[mRNA2]                               |
| 18   | [pi3k*]+[Akt]=>[p-Akt]                   | at.[pi3k*].[Akt]                          |
| 19   | [p-Akt]+[DNA]=>[mRNA2-1-1]               | kj.[p-Akt].[DNA]                          |
| 20   | [mRNA2-1-1]=>[iNOS]                      | hg.[mRNA2-1-1]                            |
| 21   | L-Arg+iNOS=>NO                           | hg.L-Arg/(fd+[L-Arg])                     |
| 22   | [NO]+[CAAT]=>[C/EBP]                     | vm.[NO].[CAAT]                            |
| 23   | [C/EBP]=>[CHOP]                          | cvc.[CAAT]/(kc+[CAAT])                    |
| 24   | [DNA]+[CHOP]=>[mRNA2-1]                  | vch.[CHOP]/(kch+[CHOP])                   |
| 25   | [mRNA2-1]=>[BAX]                         | fbax.[mRNA2-1]                            |
| 26   | [BAX]+[BCL2]=>[BCL2-BAX]2`               | vbax.[BAX]/(kbax+[BAX])                   |
| 27   | [BCL2-BAX]2=> [Apoptotic signal]         | vx.[BCL2-BAX]2                            |
| 28   | [17β-estradiol]+[cER]=>[E-cER]           | ecr.[17β-estradiol].[cER]                 |
| 29   | E-cER=>[E-cER]2                          | ed.[E-cER]                                |

|    |                                            |                                        |
|----|--------------------------------------------|----------------------------------------|
| 30 | [E-cER]2+[DNA]=>[mRNA2]                    | nt.[E-cER]2.[DNA]                      |
| 31 | [mRNA2]=>[IFN-γ]                           | ifp.[mRNA2]                            |
| 32 | [IFNGR]+[IFN-γ]=>[IFNγ-IFNGR]              | vm.[CREB]/(kd+[CREB])                  |
| 33 | [IFNγ-IFNGR]=>[IFNγ-IFNGR]2                | rd.[IFNγ-IFNGR]                        |
| 34 | [IFNγ-IFNGR]2=>[IFNγ-IFNGR*]2              | rc.[IFNγ-IFNGR]2                       |
| 35 | [IFNγ-IFNGR*]2+[RAS]+[shc-grb2sos]=>[RAS*] | kx.[IFNγ-IFNGR*]2.[RAS*].[shc-grb2sos] |

106

107 **Table 2:** Receptor Binding maxima and Kd values (A), Signaling Molecule concentrations (B)

108 and Ligand concentrations (C) as incorporated in the model.

109 **2A**

| S.No. | Receptor | Bmax                            | Kd (nM) | Reference |
|-------|----------|---------------------------------|---------|-----------|
| 1.    | α1-AR    | 175.3(fM/10 <sup>6</sup> cells) | 0.65    | [27]      |
| 2.    | α2-AR    | 19.9(fM/10 <sup>6</sup> cells)  | 3.7     | [28]      |
| 3.    | β2-AR    | 1222 sites/cell                 | 19.9    | [29, 30]  |
| 4.    | IFN-gR   | 708±14 receptors/cell           | 0.9±0.2 | [30]      |
| 5.    | cER      | 0.6204 (fM/mg protein)          | 5.5     | [31]      |
| 6.    | nER      | (0.136 fm/mcg dna)              | -       | [31]      |

110

111 **2B**

| S.No. | Signaling Moelcules | Concentration | Reference |
|-------|---------------------|---------------|-----------|
| 1.    | ERK                 | 251           | [17]      |
| 2.    | CREB                | 245.6         |           |
| 3.    | Akt                 | 219           |           |
| 4.    | IFN-g               | 560           |           |

112

113 **2C**

| S.No. | Signaling Moelcules | Concentration      | Reference |
|-------|---------------------|--------------------|-----------|
| 1.    | Phenylephrine       | 10 <sup>-6</sup> M |           |

|    |             |             |          |
|----|-------------|-------------|----------|
| 2. | Clonidine   | $10^{-6}$ M | [17, 18] |
| 3. | Terbutaline | $10^{-6}$ M |          |
| 4. | Estrogen    | $10^{-8}$ M |          |

114

115

## 116 **2.2 Simulations**

117 Simulations were performed using Ode15s solvers at different time points depending  
118 upon the signals studied. For signaling molecules including p-ERK, p-Akt, p-CREB, and cAMP,  
119 simulations were performed for 0.05 seconds in order to capture the rapid  
120 neurotransmitter/steroid hormone-mediated transduction. For the cytokines including IL-2 and  
121 IFN- $\gamma$ , the simulations were performed for 24 hours. For antioxidant enzymes and ROS/RNS the  
122 simulations were performed up to 3000 seconds. Finally, for survival v/s apoptotic signals, the  
123 simulations were carried out for 72 hours.

## 124 **2.3 Sensitivity Analysis**

125 Key regulatory molecules were scanned and their sensitivities were analyzed at 24 hours  
126 for each of the ligands used. In this case, phenylephrine-, clonidine-, terbutaline-, and 17 $\beta$ -  
127 estradiol-mediated signals were scanned for their sensitivities in two groups: (a) molecular  
128 markers (p-ERK, p-CREB, p-Akt and cAMP) and (b) cytokines (IL-2 and IFN- $\gamma$ ).

## 129 **2.4 Docking**

130 Molecular docking was performed by keeping the ERK molecule or the  $\beta$ 2-AR molecule  
131 rigid and ligand (NE or 17 $\beta$ -estradiol) flexible (Rigid Docking). This resulted in different  
132 conformations in each run and the best conformer which fits with lowest binding energy  
133 (kcal/mol) was chosen and written as a PDB file using UCSF Chimera. Auto Dock4.2.6 was used



134 to automatically dock the ligands to the enzyme. In this version the windows platform, cygwin  
135 was used for our analyses. The enzyme/receptor molecule was loaded and stored as a .pdb file  
136 after assigning hydrogen bonds and kollman charges. The investigation ligands were loaded and  
137 their torsions along with rotatable bonds were assigned and the file saved as ligand .pdbqt. Grid  
138 menu is toggled, after loading enzyme .pdbqt the map files were selected directly with setting up  
139 grid points with 80 X 106 X 90 dimensions for the searching of ligand within the active site of  
140 the enzyme molecule. This way the grid parameter files were created. The docking parameter  
141 files were then set up with search parameter as genetic algorithm and docking parameter utilizing  
142 Lamarckian genetic algorithm. Following up of grid parameter files (gpf) and docking log files  
143 (dlg), the command prompt was toggled and commands were typed in stepwise for autogrid and  
144 autodock execution. The docked structures were generated after maximum number of  
145 evaluations using UCSF Chimera.

## 146 **3.0 Results**

### 147 ***3.1 17 $\beta$ -estradiol treatment alters signaling molecule expression in lymphocytes stimulated*** 148 ***with adrenergic agonists***

149 Simulation of lymphocytes with adrenergic agonists, terbutaline, clonidine, and  
150 phenylephrine (Fig. 2A), or 17 $\beta$ -estradiol (Fig. 2B) or both (Fig. 2C) significantly alters the  
151 expression of p-ERK, p-CREB, p-Akt, and cAMP. State v/s time diagrams at 0.05 seconds show  
152 significantly enhanced p-CREB and p-ERK expression alone upon stimulation with adrenergic  
153 agonists (Fig. 2A). Stimulation with 17 $\beta$ -estradiol in the absence of adrenergic agonists (Fig. 2B)  
154 or with adrenergic agonists (Fig. 2C) significantly enhanced cAMP, p-ERK, and p-CREB  
155 expression. p-Akt expression was unaltered upon stimulation of lymphocytes with 17 $\beta$ -estradiol  
156 and/or adrenergic agonists.

157 **3.2 *17 $\beta$ -estradiol and adrenergic agonists decrease superoxides but enhance peroxynitrites***  
158 ***in lymphocytes***

159 Simulation of lymphocytes with adrenergic agonists terbutaline, clonidine, and  
160 phenylephrine (Fig. 3A), or 17 $\beta$ -estradiol (Fig. 3B) or both (Fig. 3C) similarly decrease production  
161 of superoxides and enhance production of peroxynitrite in lymphocytes within the 0.1 second time  
162 interval. State v/s time diagrams up to 0.3 seconds show decreased catalase (CAT) and superoxide  
163 dismutase (SOD) activities in all treatment groups.

164 **3.3 *17 $\beta$ -estradiol with or without adrenergic agonists increases CAT and SOD activities in***  
165 ***lymphocytes but not adrenergic agonists alone***

166 Simulation of lymphocytes with adrenergic agonists terbutaline, clonidine, and  
167 phenylephrine (Fig. 4A), or 17 $\beta$ -estradiol (Fig. 4B) or both (Fig. 4C) significantly alters CAT and  
168 SOD activities and production of peroxynitrites and superoxides within 3000 seconds of  
169 stimulation. State v/s time diagrams at 3000 seconds show significantly enhanced CAT and SOD  
170 activities upon stimulation with 17 $\beta$ -estradiol alone (Fig. 4B) or 17 $\beta$ -estradiol with adrenergic  
171 agonists (Fig. 4C). Stimulation with adrenergic agonists (Fig. 4A), or with 17 $\beta$ -estradiol alone  
172 (Fig. 4B) or 17 $\beta$ -estradiol with adrenergic agonists (Fig. 4C) significantly decreased peroxynitrite  
173 production similarly.

174 **3.4 *17 $\beta$ -estradiol treatment alters cytokine production in lymphocytes stimulated with***  
175 ***adrenergic agonists***

176 Treatment with adrenergic agonists (Fig. 5A) does not alter IL-2 or IFN- $\gamma$  production in  
177 lymphocytes after 24 hours (86420 seconds) of treatment. However, treatment with 17 $\beta$ -estradiol  
178 alone (Fig. 5B) or 17 $\beta$ -estradiol with adrenergic agonists (Fig. 5C) significantly enhance IFN- $\gamma$   
179 and IL-2 production after 24 hours of treatment.

180 **3.5 *17 $\beta$ -estradiol co-stimulation of lymphocytes stimulated with adrenergic agonists***  
181 ***enhances proliferation dose-dependently***

182 Adrenergic stimulation of lymphocytes significantly enhanced pro-apoptotic signals (Fig.  
183 6A) above proliferation and favoured lymphocyte apoptosis. Co-stimulation with 17 $\beta$ -estradiol  
184 significantly enhanced proliferation and shifts the balance between pro-apoptotic and apoptotic  
185 signals (Fig. 6B). Ten-fold increase in 17 $\beta$ -estradiol concentration (Fig. 6C) further increases  
186 proliferation signals and reverses the balance in favor of proliferation over apoptosis after 24 hours.

187 **3.6 *Phenylephrine stimulation shows significantly increased sensitivity to IFN- $\gamma$  and p-***  
188 ***CREB expression***

189 Stimulation of lymphocytes with  $\alpha$ 1-AR agonist, phenylephrine, showed increased  
190 sensitivity to IFN- $\gamma$  ( $2 \times 10^{-25}$ ) but not IL-2 expression (Fig. 7A). Similarly, signaling molecules  
191 also showed altered sensitivities upon stimulation with phenylephrine, whereas p-CREB  
192 expression alone showed increased sensitivity of  $2 \times 10^{-22}$  (Fig. 7B).

193 **3.7 *Clonidine stimulation shows no alteration in sensitivity to cytokines or signaling***  
194 ***molecules***

195 There was no significant alterations in the sensitivities of IFN- $\gamma$  or IL-2 upon stimulation  
196 of lymphocytes with  $\alpha$ 2-AR agonist, clonidine (Fig. 8A). Similarly, sensitivities of signaling  
197 molecules p-ERK, p-CREB, p-Akt, and cAMP were not altered upon treatment of lymphocytes  
198 with clonidine (Fig. 8B).

199 **3.8 *Terbutaline stimulation of lymphocytes shows significantly enhanced sensitivity to IFN-***  
200  ***$\gamma$ , p-ERK, and p-CREB expression***

201 Stimulation of lymphocytes with  $\beta$ 2-AR agonist, terbutaline, showed increased sensitivity  
202 to IFN- $\gamma$  ( $3.5 \times 10^{-24}$ ) but not IL-2 production (Fig. 9A). Similarly, signaling molecules also showed

203 altered sensitivities upon stimulation with terbutaline, whereas p-ERK and p-CREB expression  
204 alone showed increased sensitivity of  $7 \times 10^{-21}$  (Fig. 9B).

### 205 **3.9 *17 $\beta$ -estradiol stimulation of lymphocytes shows significantly enhanced sensitivity to*** 206 ***IFN- $\gamma$ , p-ERK, p-CREB and cAMP expression***

207 There was a significant increase in the sensitivity of IFN- $\gamma$  ( $3.5 \times 10^{-16}$ ) upon stimulation of  
208 lymphocytes with  $17\beta$ -estradiol (Fig. 10A). Also, there was a significantly high sensitivity to  
209 signaling molecules including p-ERK, p-CREB, and cAMP upon treatment of lymphocytes with  
210  $17\beta$ -estradiol ( $6 \times 10^{-15}$ ) (Fig. 10B).

### 211 **3.10 *Direct inhibition of ERK by NE***

212 On the basis of the data obtained, the enzyme ERK (PDB ID: 2ERK; *Rattus rattus*; was  
213 inhibited by NE showing significant inhibitory activity. Analysis of the results obtained  
214 demonstrate that NE binds to the Catalytic residue Asp 147 and Glu 69; the residue that forms an  
215 ion pair with Lys 52 in the phosphate binding site of ERK with a  $K_i=207.69 \mu\text{M}$ , bond distance  
216 of  $2\text{\AA}$  and an energy of  $-5.02\text{Kcal/mol}$  (Fig. 11A) and to Asp 177 which is close to the catalytic  
217 pocket with a  $K_i=365.7\mu\text{M}$  and an energy of  $-4.69\text{Kcal/mol}$  (Fig. 11B and 11C).

### 218 **3.11 *Direct inhibition of $\beta$ 2-AR by $17\beta$ -estradiol:***

219  $17\beta$ -estradiol also bound to  $\beta$ 2-AR receptor (PDB ID: 3SN6; *Rattus norvegicus*) at the  
220 Asp 173 residue with a  $K_i$  of  $22.09 \mu\text{M}$ , bond distance of  $1.99 \text{\AA}$  and an energy of  $-6.35\text{Kcal/mol}$   
221 (Fig. 12A), the Met 61 residue with a  $K_i=11.0 \mu\text{M}$  and an energy of  $-6.76\text{Kcal/mol}$  (Fig. 12B) and  
222 the Arg 314 residue with a  $K_i= 8.77 \mu\text{M}$ , and an energy of  $-6.9\text{Kcal/mol}$  (Fig. 12C) indicating  
223 potent inhibitory effect.

## 224 **4.0 Discussion**

225 Immune functions of innate, humoral or cell-mediated origin are modulated by sympathetic  
226 signals and circulating hormone levels during health and disease in a dose and receptor-type-  
227 dependent manner [1, 10, 12, 19]. *In vitro* studies from our laboratory have shown that adrenergic  
228 stimulation through  $\alpha$ 1-,  $\alpha$ 2- or  $\beta$ 2- ARs using specific agonists non-specifically inhibit  
229 lymphoproliferation through distinct signaling pathways:  $\alpha$ 1-ARs mediated immunosuppressive  
230 effects by inhibiting IFN- $\gamma$  production,  $\alpha$ 2-AR activated the NF- $\kappa$ B, p-Akt and NO pathways and  
231  $\beta$ 2-AR activation involved IL-6, NO and NF- $\kappa$ B signaling cascades mediating immunosuppression  
232 [17, 18]. On the other hand, treatment of lymphocytes with 17 $\beta$ -estradiol enhanced proliferation  
233 in a dose and receptor subtype specific manner through p-ERK, p-CREB and p-Akt involving IFN-  
234  $\gamma$  and compensatory mechanisms including antioxidant enzymes [4, 20]. Our studies have shown  
235 that co-treatment of lymphocytes with 17 $\beta$ -estradiol and adrenergic agonists lead to 17 $\beta$ -estradiol-  
236 mediated over-ride of adrenergic immunosuppression in a dose-dependent, AR-subtype  
237 independent manner [17, 18].

238 In the present study, we have modeled these signaling pathways *in silico* using MATLAB  
239 Simbiology toolbox. Due to difficulties in conducting the experiments using NE, the *in vitro*  
240 studies were conducted using receptor-specific agonists and antagonists. While these experiments  
241 are highly beneficial in elucidating the dose-dependent effects on specific adrenoceptor sub-types,  
242 they cannot be considered as absolute indicators of NE-mediated effects. This is because when NE  
243 is added to the cells, depending on its relative affinity for the individual receptor subtypes, it may  
244 bind proportionally to all the ARs triggering a wide variety of down-stream signals. The  
245 cumulative effects of these signals are likely to be different from the outcomes of receptor-subtype-  
246 specific signaling fates. In order to overcome this problem, the simulation model was constructed  
247 on the basis of the data obtained from *in vitro* studies and all three ARs studied were

248 simultaneously activated to study the outcome. Based on previous findings, an attempt was made  
249 to incorporate cross-talks between these pathways by using common signaling molecule pools.

250 As expected, the simulation of lymphocytes with adrenergic agonists, phenylephrine,  
251 clonidine, and terbutaline enhanced p-CREB and p-ERK expression in accordance with classical  
252 adrenergic signaling cascades within a few milliseconds.  $17\beta$ -estradiol behaved similarly in the  
253 presence and absence of adrenergic agonists enhancing cAMP, p-ERK, and p-CREB expression  
254 suggesting that activation of cAMP may be crucial to  $17\beta$ -estradiol-mediated over-ride of  
255 adrenergic immunosuppression.

256 A significant role is played by compensatory mechanisms such as antioxidant enzyme apart  
257 from signaling molecules, to influence the proliferative/apoptotic milieu of a cell by balancing free  
258 radical load including superoxides and peroxy-nitrites to name a few. These free radicals released  
259 as by-products following immune responses or during neurotransmitter release in secondary  
260 lymphoid organs may accumulate over the years and contribute to denervation of sympathetic  
261 noradrenergic fibers leading to impaired neuroendocrine-immune homeostasis setting the stage for  
262 age-associated diseases [7]. Studies from our lab and others have documented ER-subtype  
263 dependent increase in SOD and GPx activities in lymphocytes stimulated with estrogen [4, 21-24].  
264 Adrenergic stimulation also enhanced SOD and catalase activities *in vitro* which were suppressed  
265 upon coincubation with  $17\beta$ -estradiol indicating cross-talk between the two pathways leading to  
266 diminutive effects [18]. Along these lines, previous studies have implicated the involvement of  
267 PKA and ERK pathways, which when inhibited, reversed terbutaline-mediated increase in SOD  
268 and CAT activities. It is possible that these signaling molecules play a regulatory role in the  
269 expression and activity of these enzymes, thereby, exerting immunomodulatory effects [25, 26].  
270 In our model, adrenergic activation,  $17\beta$ -estradiol treatment, and their co-treatment decrease

271 superoxide formation but enhance peroxynitrites, although  $17\beta$ -estradiol treatment or co-treatment  
272 alone was accompanied by an induction of SOD and CAT activities within the 3000 second time  
273 frame.

274 Cytokines play a crucial role in influencing immune functions thereby affecting  
275 survival/apoptosis. Previously we have shown that while activation of  $\alpha 1$ -ARs decrease IFN- $\gamma$  and  
276 increase IL-2 production,  $\alpha 2$ - and  $\beta 2$ -AR activation did not alter both IFN- $\gamma$  and IL-2 production.  
277 Co-activation of all three signals show that adrenergic stimulation does not alter IL-2 or IFN- $\gamma$   
278 production in lymphocytes after 24 hours (86420 seconds) of treatment. However, treatment with  
279  $17\beta$ -estradiol alone or  $17\beta$ -estradiol with adrenergic agonists significantly enhance IFN- $\gamma$   
280 production alone after 24 hours of treatment. We have reported dose-dependent increase in IFN- $\gamma$   
281 production with  $17\beta$ -estradiol alone or co-treated with  $\alpha 1$ - and  $\beta 2$ -AR agonists. In agreement with  
282 these findings, sensitivity analysis show that stimulation of lymphocytes with  $\alpha 1$ -AR agonist,  
283 phenylephrine, showed increased sensitivity to IFN- $\gamma$  ( $2 \times 10^{-25}$ ) and p-CREB expression  $2 \times 10^{-22}$   
284 while  $\beta 2$ -AR agonist terbutaline showed increased sensitivity to IFN- $\gamma$  ( $3.5 \times 10^{-24}$ ), p-ERK and p-  
285 CREB expression  $7 \times 10^{-21}$ . Interestingly  $17\beta$ -estradiol signaling showed the highest sensitivity to  
286 IFN- $\gamma$  ( $3.5 \times 10^{-16}$ ), p-ERK, p-CREB, and cAMP ( $6 \times 10^{-15}$ ) suggesting a probable cause in the  
287 dynamics of  $17\beta$ -estradiol-mediated signals that predispose it to over-ride adrenergic signals.

288 In order to assess the likely effects of the signals and their cross-talks on proliferation, end-  
289 point signals were classified as either pro-apoptotic or survival signals. Plots obtained at the end  
290 of 72 hours indicate that while adrenergic stimulation was predominantly pro-apoptotic signals,  
291  $17\beta$ -estradiol signals were pro-survival. Dose-dependent role of  $17\beta$ -estradiol could be seen by  
292 increasing the  $17\beta$ -estradiol concentration by 10-fold leading to further increase in proliferation  
293 signals reversing the balance in favor of proliferation over apoptosis after 72 hours. This is in

294 accordance with the *in vitro* evidence generated in previous studies where all the adrenergic  
295 agonists decreased proliferation while 17 $\beta$ -estradiol played a dose-dependent role in increasing  
296 proliferation of lymphocytes.

297 Finally, docking studies show that apart from modulating signaling mechanisms,  
298 NE can directly inhibit ERK and estrogen can directly bind to key residues on  $\beta_2$ -AR inhibiting its  
299 subsequent signal transduction processes. Thus, *in silico* modeling of estrogen and adrenergic  
300 signaling pathways in lymphocytes implicates the involvement of cAMP and ERK as key  
301 regulatory molecules that influence the cross-talk between the signaling cascades mediating  
302 immunomodulatory effects. Modeling estrogen and adrenergic stimulation-mediated signals will  
303 help us to understand variations in the expression of downstream molecular markers with age- and  
304 disease-associated variations in kinetic parameters and concentrations and thereby providing an  
305 effective tool for understanding the alterations in the cross talk between the pathways in health,  
306 aging, and diseases.

307 **Acknowledgement:** Supported by the Department of Science and Technology (F.No. SR/SO/HS-  
308 46/2007 and IFA15/LSBM-154), Government of India, New Delhi.

### 309 **References**

- 310 1. Ader R, Felten D, Cohen N. Psychoneuroimmunology. 3rd Edition. Academic Press; San  
311 Diego, CA. 2001.
- 312 2. Priyanka HP, Sharma U, Gopinath S, Sharma V, Hima L, ThyagaRajan S. Menstrual cycle  
313 and reproductive aging alters immune reactivity, NGF expression, antioxidant enzyme  
314 activities, and intracellular signaling pathways in the peripheral blood mononuclear cells  
315 of healthy women. *Brain Behavior Immunity*. 2013; 32: 131–143.



- 316 3. ThyagaRajan S, Priyanka HP. Bidirectional communication between the neuroendocrine  
317 system and the immune system: relevance to health and diseases. *Annals of Neurosciences*.  
318 2011; 19: 40-46.
- 319 4. Priyanka HP, Krishnan HC, Singh RV, Hima L, ThyagaRajan S. Estrogen modulates in  
320 vitro T cell responses in a concentration- and receptor dependent manner: effects on  
321 intracellular molecular targets and antioxidant enzymes. *Molecular Immunology*. 2013; 56:  
322 328–339.
- 323 5. Lu JKH. Changes in ovarian function and gonadotropin and prolactin secretion in aging  
324 female rats. In: Meites J (Ed). *Neuroendocrinology of Aging*, (pp.103-122), Plenum, New  
325 York. 1983.
- 326 6. Wise PM. Alterations in the proestrous pattern of median eminence LHRH, serum LH,  
327 FSH, estradiol and progesterone concentrations in middle-aged rats. *Life Sciences*. 1982;  
328 31: 165-173.
- 329 7. ThyagaRajan S, Madden KS, Teruya B, Stevens SY, Felten DL, Bellinger DL. (2011).  
330 Age-associated alterations in sympathetic noradrenergic innervation of primary and  
331 secondary lymphoid organs in female Fischer 344 rats. *Journal of Neuroimmunology*.  
332 2011; 233: 54-64.
- 333 8. Lang TJ. Estrogen as an immunomodulator. *Clinical Immunology*. 2004; 113: 224-230.
- 334 9. Meites J. Aging: hypothalamic catecholamines, neuroendocrine-immuneinteractions, and  
335 dietary restriction. *Proceedings of the Society for Experimental Biology and Medicine*.  
336 1990; 195: 304-311.

- 337 10. Felten DL, Felten SY, Bellinger DL, Carlson SL, Ackerman KD, Madden KS, Olschowki  
338 JA, Livnat S. Noradrenergic sympathetic neural interactions with the immune system:  
339 structure and function. *Immunological Reviews*. 1987; 100: 225-260.
- 340 11. Madden KS. Catecholamines, sympathetic innervation, and immunity. *Brain Behavior*  
341 *Immunity*, 2003; 17: S5-S10.
- 342 12. Madden KS, Felten DL. Experimental basis for neural-immune interactions. *Physiological*  
343 *Reviews*. 1995; 75: 77-106.
- 344 13. Nance DM, Sanders VM. Autonomic innervation and regulation of the immune system  
345 (1987-2007). *Brain Behavior Immunity*. 2007; 21: 736-774.
- 346 14. Cunningham M, Gilkeson G. Estrogen receptors in immunity and autoimmunity. *Clinical*  
347 *Reviews in Allergy and Immunology*. 2011; 40: 66-73.
- 348 15. Bao JY, Huang Y, Wang F, Peng YP, Qiu YH. Expression of alpha-AR subtypes in T  
349 lymphocytes and role of the alpha-ARs in mediating modulation of T cell function.  
350 *Neuroimmunomodulation*. 2007; 14: 344-353.
- 351 16. Sanders VM. The beta2-adrenergic receptor on T and B lymphocytes: do we understand it  
352 yet? *Brain Behavior Immunity*. 2012; 26: 195-200.
- 353 17. Priyanka HP, ThyagaRajan S. Selective modulation of lymphoproliferation and cytokine  
354 production via intracellular signaling targets by  $\alpha$ 1- and  $\alpha$ 2-adrenoceptors and estrogen in  
355 splenocytes. *International Immunopharmacology*. 2013; 17: 774-784.
- 356 18. Priyanka HP, Pratap UP, Singh RV, ThyagaRajan S. Estrogen modulates  $\beta$ 2-adrenoceptor-  
357 induced cell-mediated and inflammatory immune responses through ER- $\alpha$  involving  
358 distinct intracellular signaling pathways, antioxidant enzymes, and nitric oxide. *Cellular*  
359 *Immunology*. 2014; 292: 1-8.

- 360 19. Bellinger DL, Lorton D. Autonomic regulation of cellular immune function. *Autonomic*  
361 *Neuroscience*. 2014; 182: 15-41.
- 362 20. Kale P, Mohanty A, Mishra M, Pratap UP, Priyanka HP, ThyagaRajan S. Estrogen  
363 modulates neural-immune interactions through intracellular signaling pathways and  
364 antioxidant enzyme activity in the spleen of middle-aged ovariectomized female rats.  
365 *Journal of Neuroimmunology*. 2014; 267: 7-15.
- 366 21. Abbas AM, Elsamanoudy AZ. Effects of 17 $\beta$ -estradiol and antioxidant administration on  
367 oxidative stress and insulin resistance in ovariectomized rats. *Canadian Journal of Physiology*  
368 *and Pharmacology*. 2011; 89: 497-504.
- 369 22. Brann D, Raz L, Wang R, Vadlamudi R, Zhang Q. Oestrogen signalling and  
370 neuroprotection in cerebral ischaemia. *Journal of Neuroendocrinology*. 2012; 24: 34-47.
- 371 23. Simpkins JW, Green PS, Gridley KE. Role of estrogen replacement therapy in memory  
372 enhancement and the prevention of neuronal loss associated with Alzheimer's disease. *The*  
373 *American Journal of Medicine*. 1997; 103: S19-S25.
- 374 24. Stirone C, Duckles SP, Krause DN, Procaccio V. Estrogen increases mitochondrial  
375 efficiency and reduces oxidative stress in cerebral blood vessels. *Molecular Pharmacology*.  
376 2005; 68: 959-965.
- 377 25. Sugino N, Karube-Harada A, Sakata A. Different mechanisms for the induction of copper-  
378 zinc superoxide dismutase and manganese superoxide dismutase by progesterone in human  
379 endometrial stromal cells. *Human Reproduction*. 2002; 17: 1709-1714.
- 380 26. Yano S, Yano N. Regulation of catalase enzyme activity by cell signaling molecules.  
381 *Molecular and Cellular Biochemistry*. 2002; 240 (1-2): 119-130.

- 382 27. Ricci A, Bronzetti E, Conterno A, Greco S, Mulatero P, Schena M, Schiavone D, Tayebati  
383 SK, Veglio F, Amenta F. Alpha 1-adrenergic receptor subtypes in human peripheral blood  
384 lymphocytes. *Hypertension*. 1999; 33(2): 708-712.
- 385 28. Titinchi S, Clark B. Alpha 2-adrenoceptors in human lymphocytes: direct characterisation  
386 by [3H] yohimbine binding. *Biochemical and Biophysical Research Communications*.  
387 1984; 31: 1-7.
- 388 29. Hataoka I, Okayama M, Sugi M, Inoue H, Takishima T, Shirato K. Decrease in beta-  
389 adrenergic receptors of lymphocytes in spontaneously occurring acute asthma. *Chest*.  
390 1993; 104: 508-514.
- 391 30. van den Meiracker AH, Man in't Veld AJ, Boomsma F, Fischberg DJ, Molinoff PB,  
392 Schalekamp MA. Hemodynamic and beta-adrenergic receptor adaptations during long-  
393 term beta-adrenoceptor blockade. Studies with acebutolol, atenolol, pindolol, and  
394 propranolol in hypertensive patients. *Circulation*. 1989; 80 (4): 903-14.
- 395 31. Bongioanni P, Lombardo F, Fioretti C, Meucci G. T-lymphocyte immunointerferon  
396 receptors in patients with multiple sclerosis. *Journal of Neurology*. 1996; 243: 605-610.
- 397 32. Feng S. Estrogen receptor content of peripheral blood lymphocytes in patients with SLE.  
398 *Zhonghua Yi Xue Za Zhi*. 1991; 71(2): 1-3.

## 399 **Figure Legends**

400 **Figure 1** *In silico model of adrenergic and estrogen signaling cascades in lymphocytes:* The  
401 cross-talk between the adrenergic and estrogen-mediated signals result in specific  
402 immunomodulatory effects depending upon the estrogen concentration. The layout of the signaling  
403 pathway is elucidated from receptors to transduction into the cytosol and nuclear translocation of  
404 signaling molecules leading to specific outcomes.

405 **Figure 2** *Alteration of signaling molecules with adrenergic agonists and 17 $\beta$ -estradiol*  
406 *treatment:* While adrenergic agonists enhanced p-CREB and p-ERK expression (A), 17 $\beta$ -estradiol  
407 treatment alone (B) or with adrenergic agonists (C) enhanced cAMP, p-ERK and p-CREB  
408 expression.

409 **Figure 3** *Adrenergic and estrogen signaling alter superoxides and peroxynitrites:* Both  
410 adrenergic (A) and estrogen (B) signaling, alone or together (C) decrease superoxides and enhance  
411 production of peroxynitrite in lymphocytes.

412 **Figure 4** *Adrenergic and estrogen signaling alter superoxides and peroxynitrites*  
413 *differentially:* Estrogen treatment alone (B) or on adrenergic agonist-treated lymphocytes (C)  
414 enhanced CAT and SOD activities and decreased peroxynitrite production. These effects were not  
415 observed on adrenergic stimulation alone (A).

416 **Figure 5** *17 $\beta$ -estradiol but not adrenergic stimulation alters cytokine production:* Treatment  
417 with 17 $\beta$ -estradiol alone (B) or 17 $\beta$ -estradiol with adrenergic agonists (C) but not adrenergic  
418 agonists alone (A) significantly enhances IFN- $\gamma$  production after 24 hours of treatment.

419 **Figure 6** *17 $\beta$ -estradiol enhances survival signals while adrenergic signals are pro-*  
420 *apoptotic:* Adrenergic stimulation of lymphocytes favors lymphocyte apoptosis over survival (A)  
421 while treatment with estrogen alone (B) or co-stimulation with 17 $\beta$ -estradiol shifts the balance in  
422 favor survival signals (C).

423 **Figure 7**  *$\alpha$ 1-AR stimulation is sensitive to IFN- $\gamma$  and p-CREB:* Sensitivity analysis showed  
424 that  $\alpha$ 1-AR stimulation was sensitive to IFN- $\gamma$  ( $2 \times 10^{-25}$ ; A) and p-CREB ( $2 \times 10^{-22}$ ; B).

425 **Figure 8**  *$\alpha$ 2-AR stimulation is not sensitive to cytokine production or signaling molecules:*  
426 Clonidine mediated signaling is not sensitive to cytokines (A) or signaling molecules (B).

427 **Figure 9**  *$\beta$ 2-AR stimulation of lymphocytes is sensitive to IFN-g, p-ERK and p-CREB*  
428 *expression: Terbutaline treatment –mediated signals are sensitive to IFN- $\gamma$  ( $3.5 \times 10^{-24}$ ; A) and p-*  
429 *ERK and p-CREB expression ( $7 \times 10^{-21}$ ; B).*

430 **Figure 10** *Estrogen receptor stimulation is sensitive to IFN-g, p-ERK, p-CREB and cAMP*  
431 *expression:  $17\beta$ -estradiol –mediated signals are sensitive to IFN- $\gamma$  ( $3.5 \times 10^{-16}$ ; A), p-ERK, p-*  
432 *CREB, and cAMP ( $6 \times 10^{-15}$ ; B).*

433 **Figure 11** *Norepinephrine inhibits catalytic and phosphate binding residues of ERK:*  
434 *Norepinephrine inhibits ERK (PDB ID: 2ERK; *Rattus rattus*) by binding to the catalytic and*  
435 *phosphate binding residues (A), and residues close to the catalytic pocket (B and C).*

436 **Figure 12**  *$17\beta$ -estradiol inhibits  $\beta$ 2-AR binding to key residues:  $17\beta$ -estradiol inhibits  $\beta$ 2-AR*  
437 *receptor (PDB ID: 3SN6; *Rattus norvegicus*) by binding to the G-protein binding sites (A, B and*  
438 *C).*

Figure 1

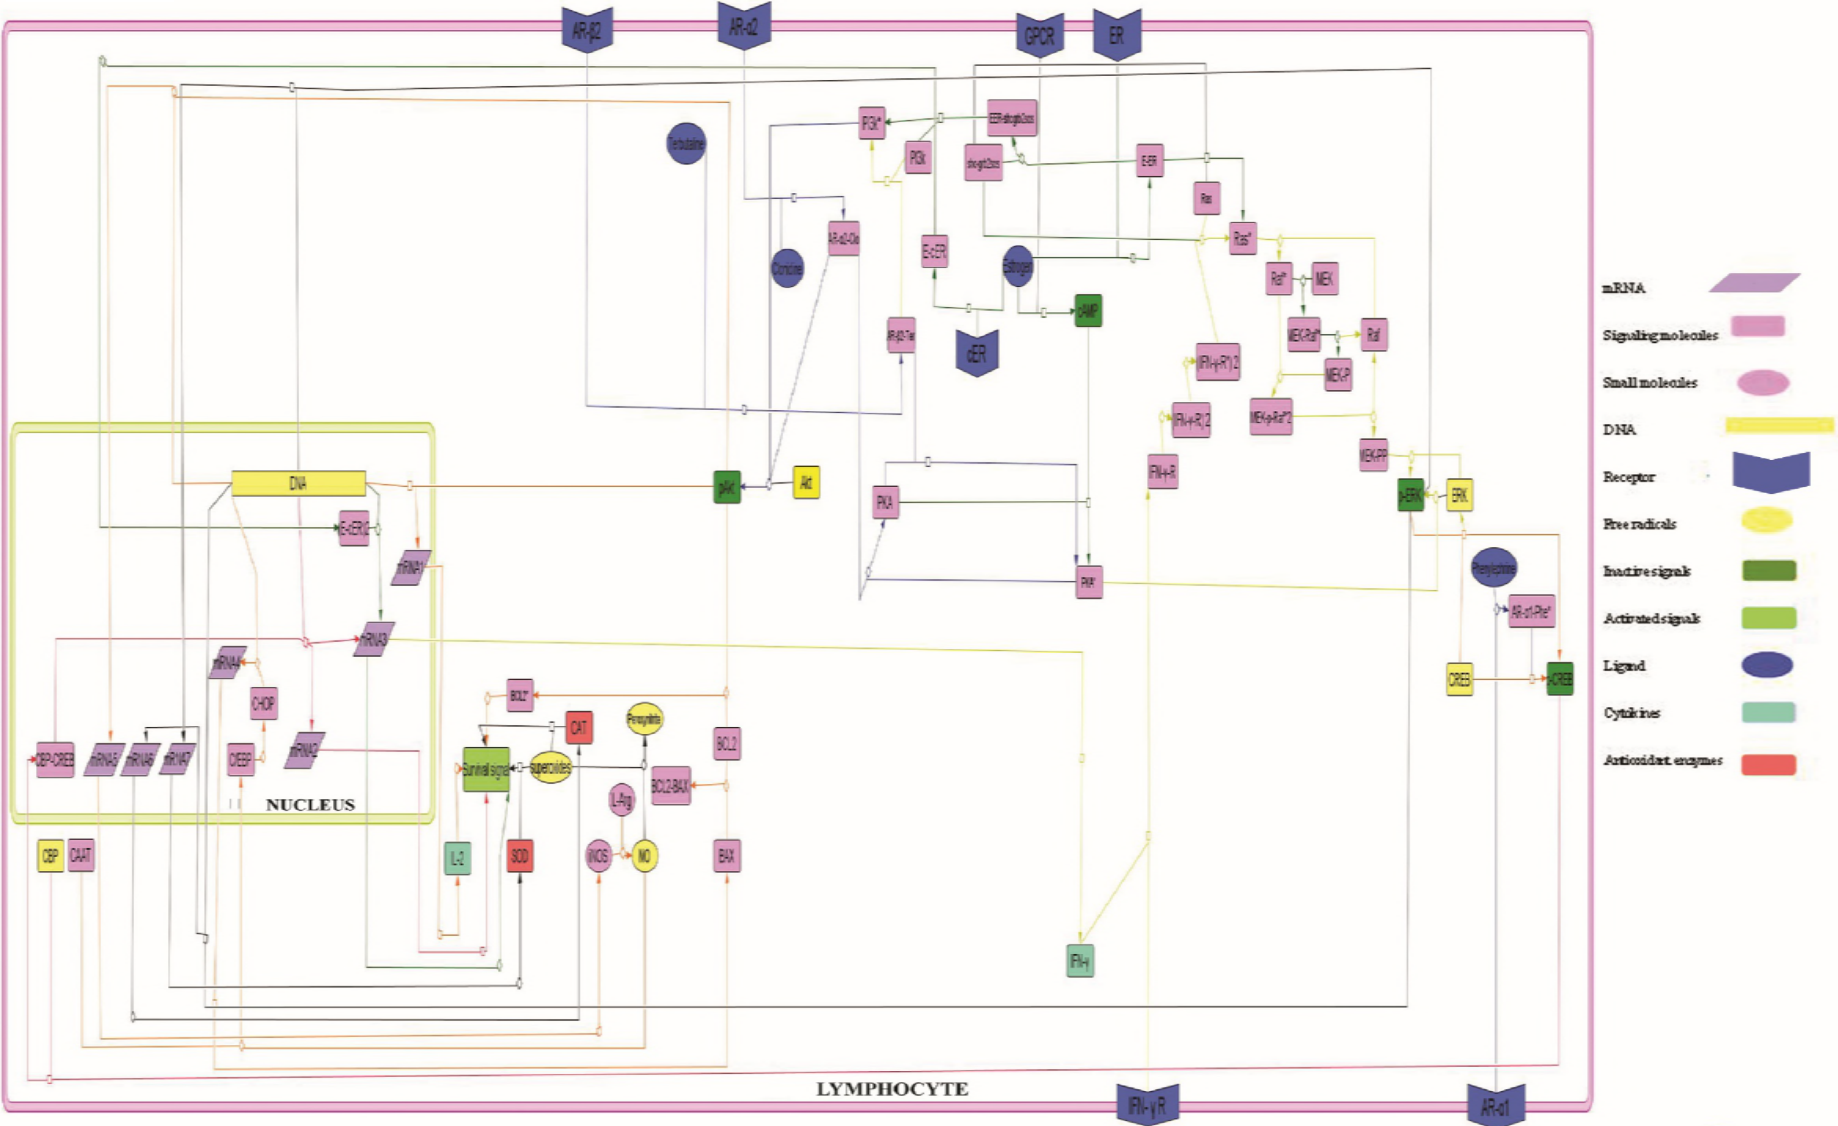

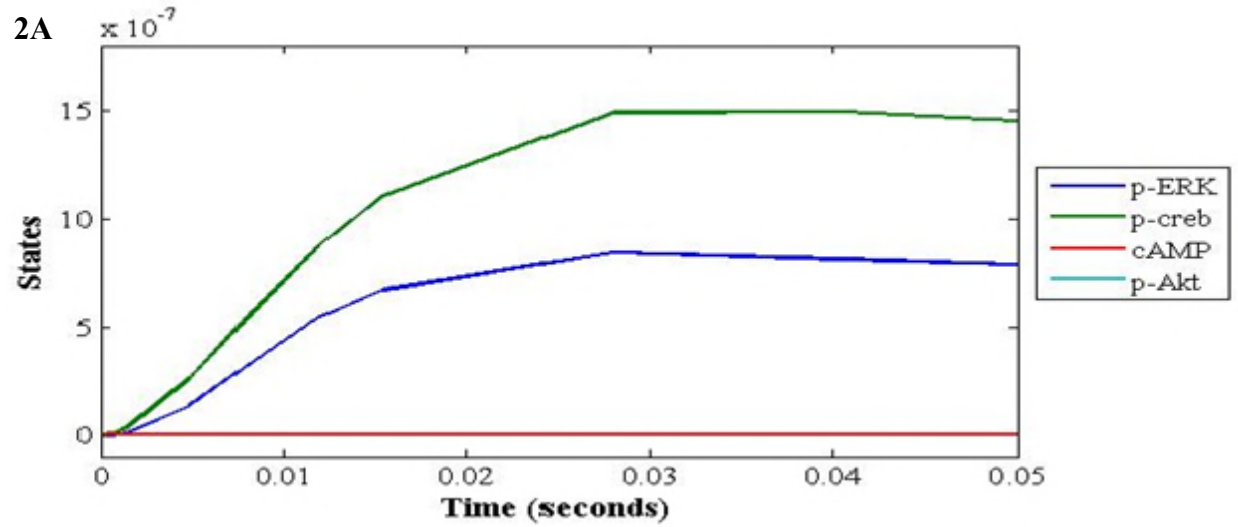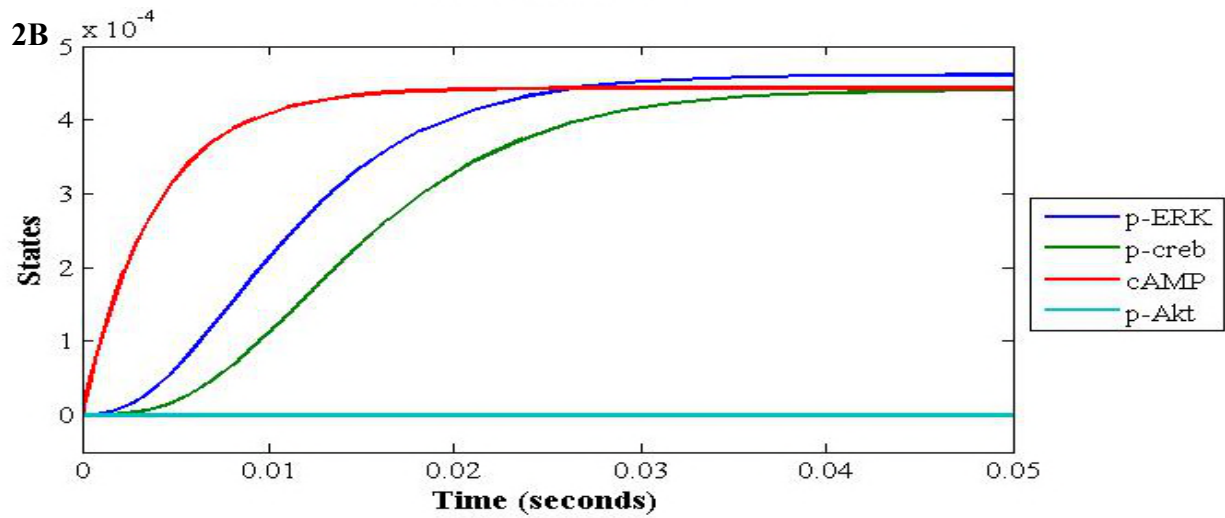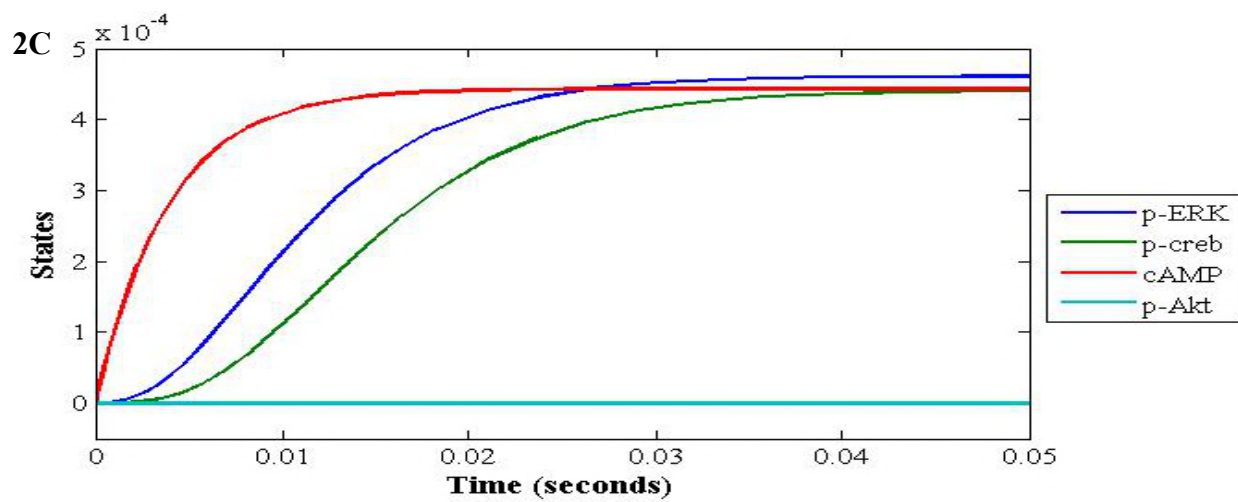



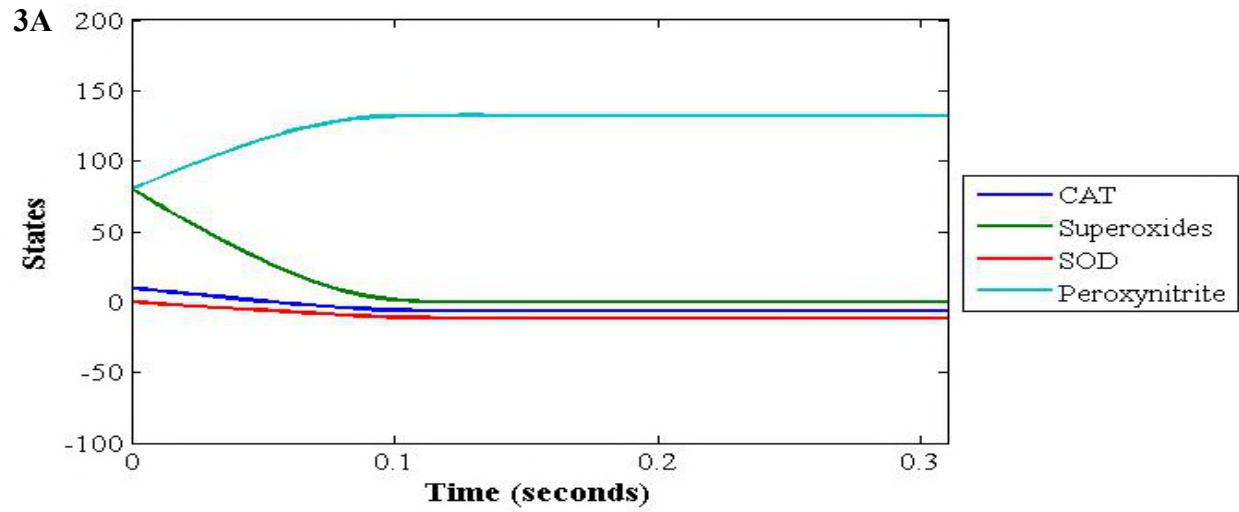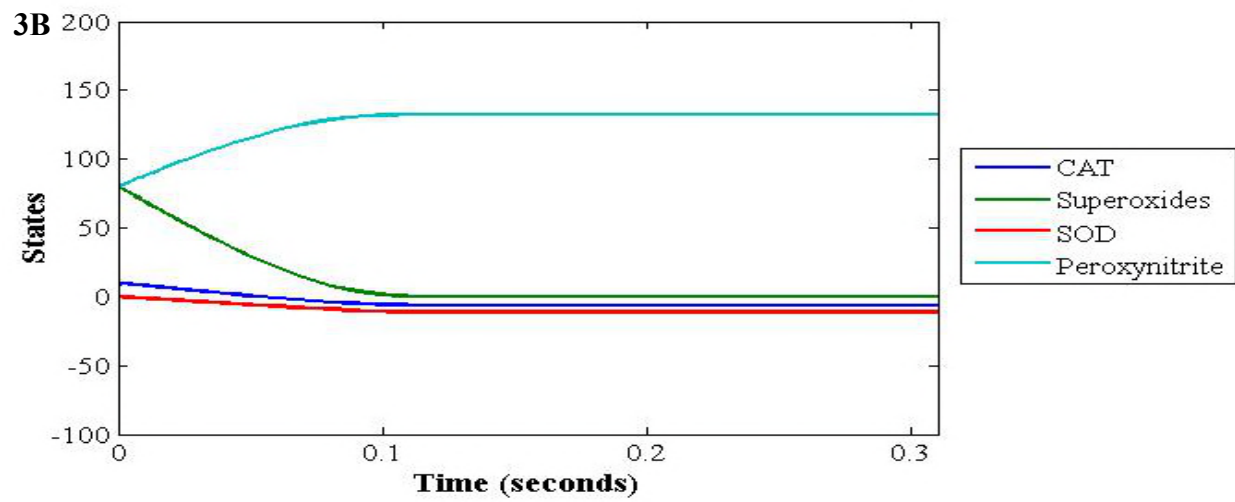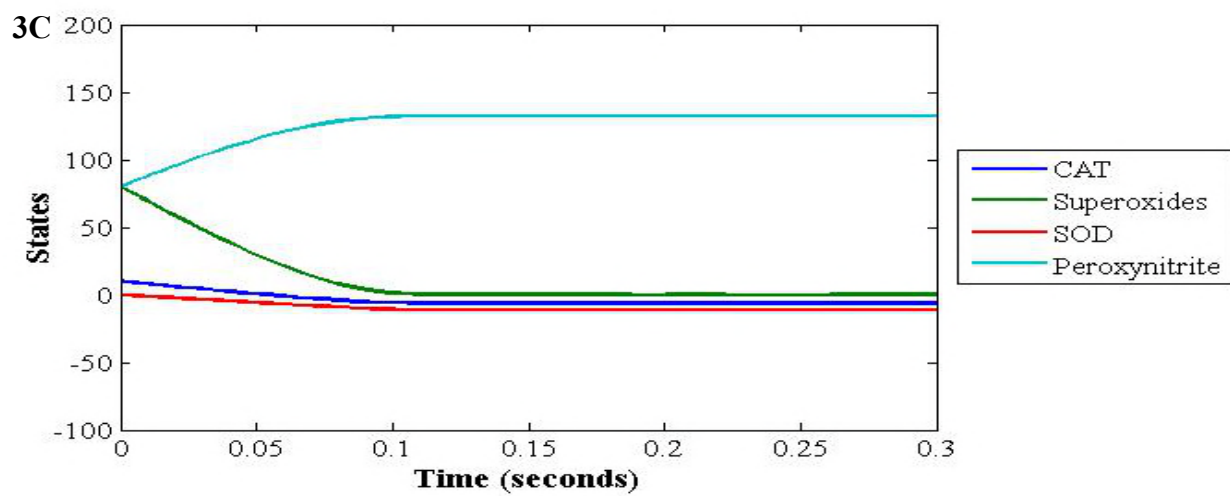

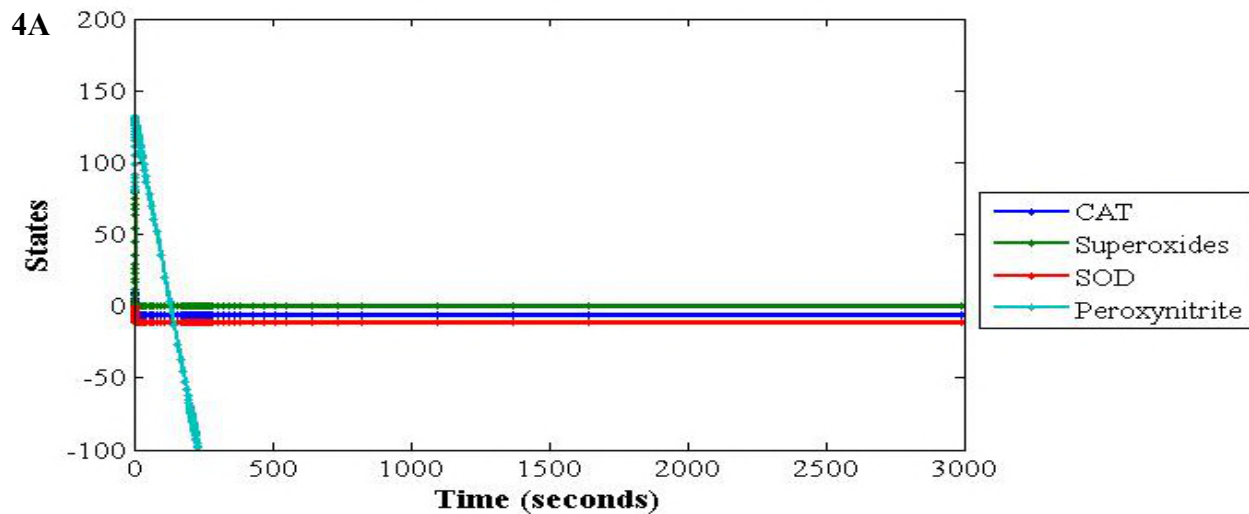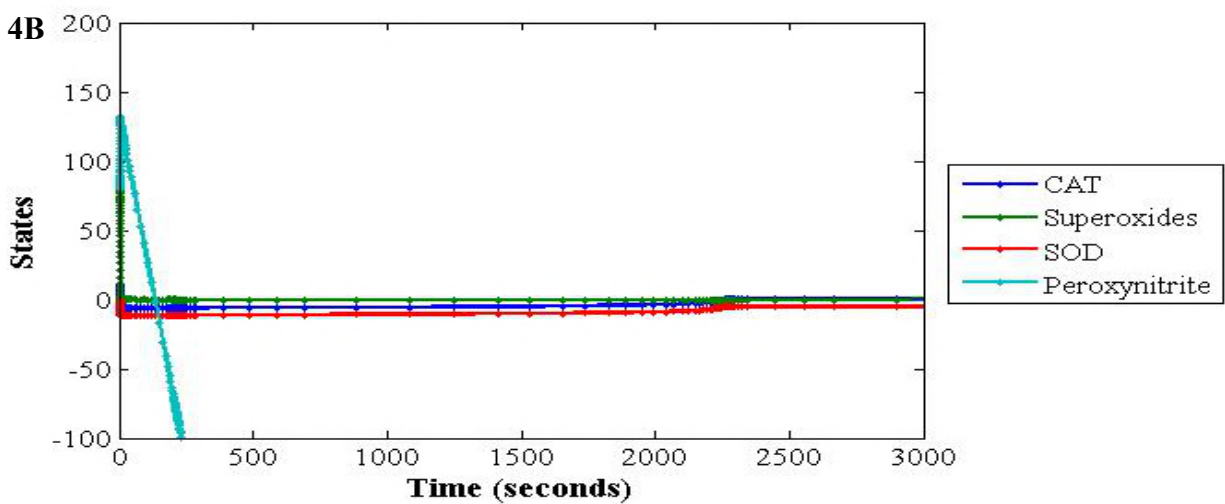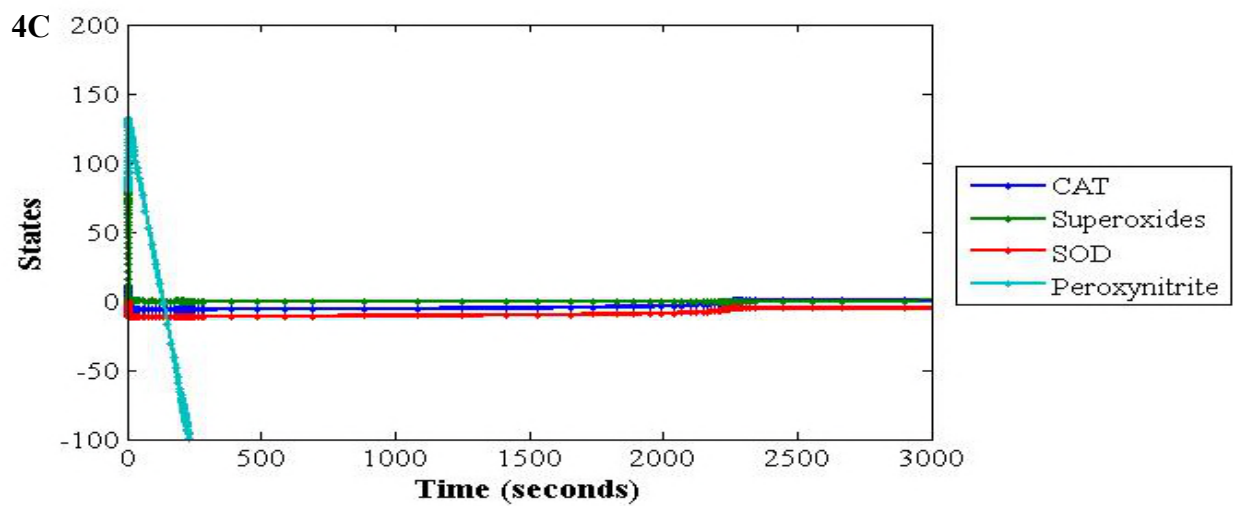

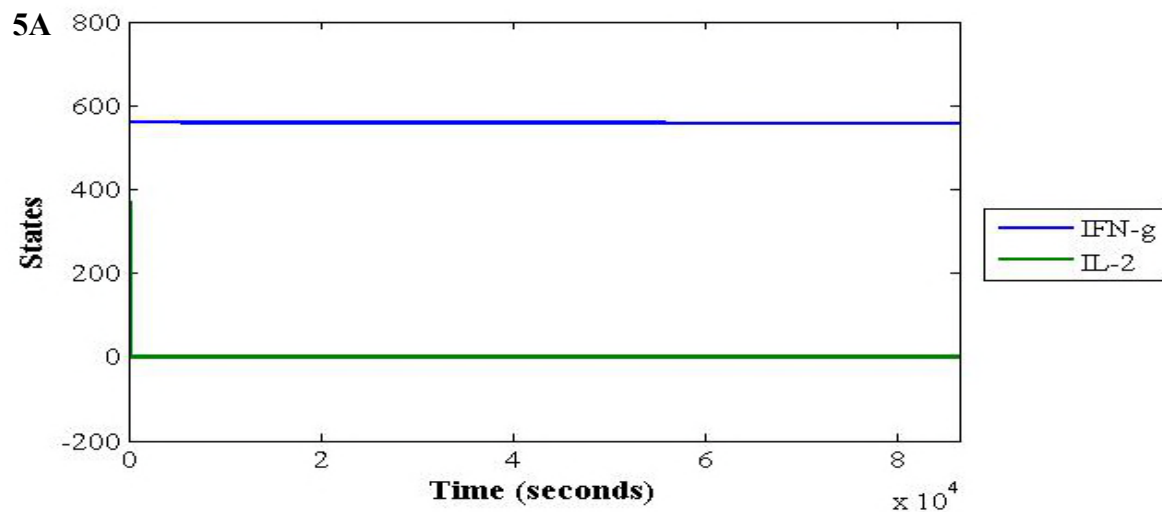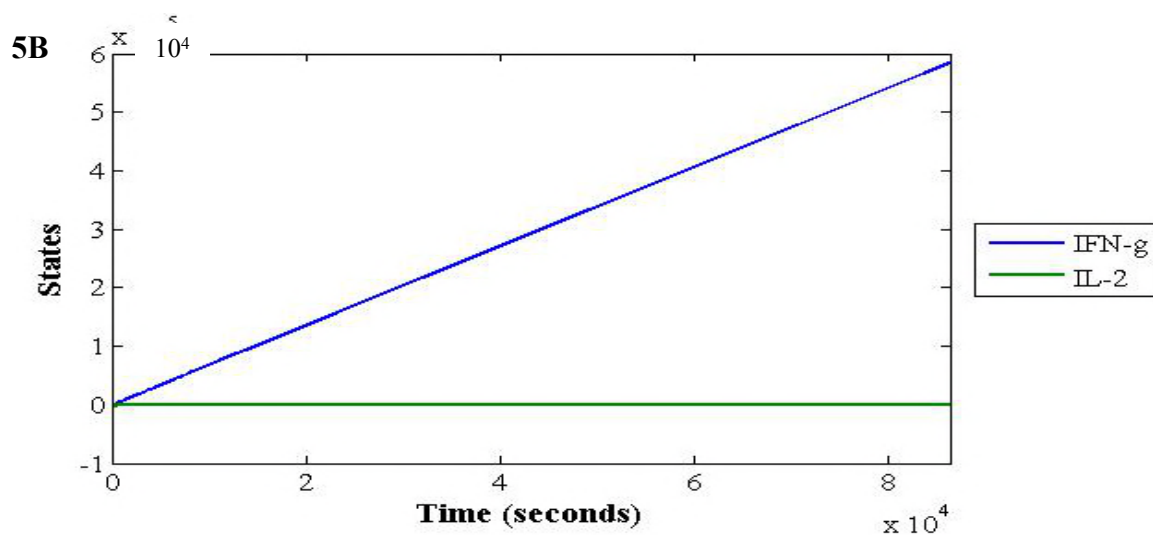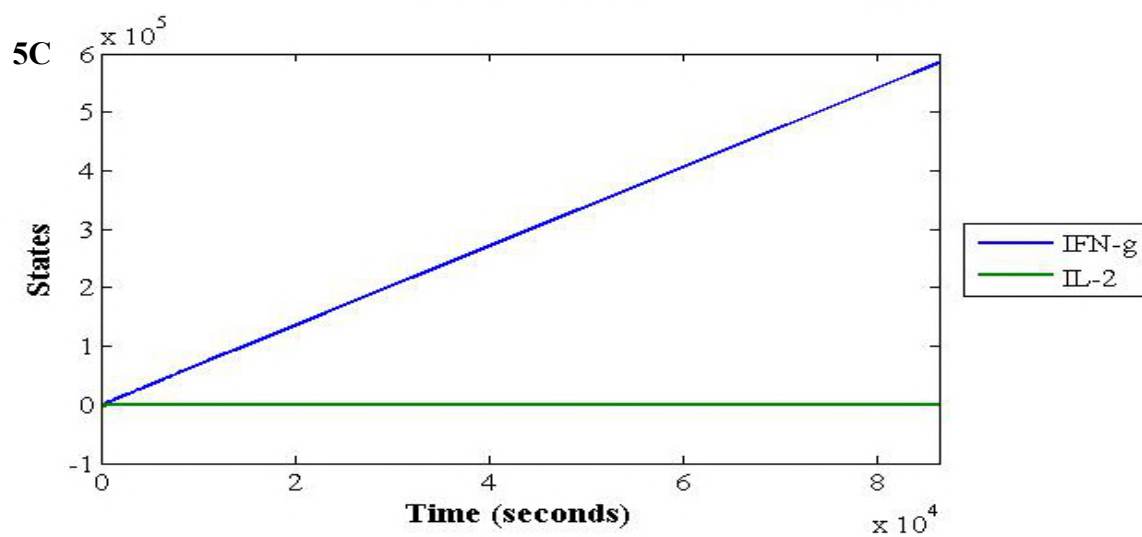

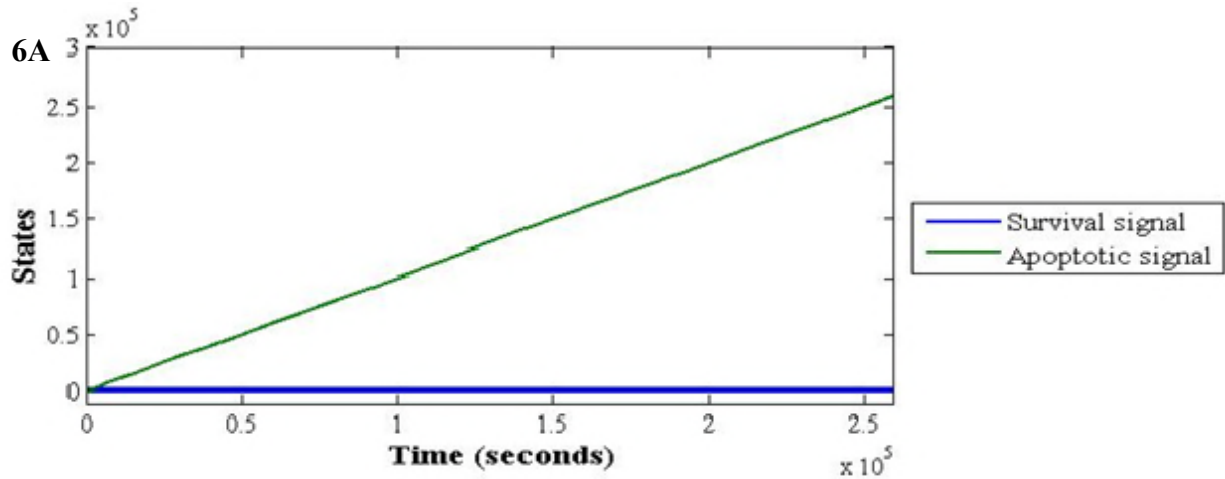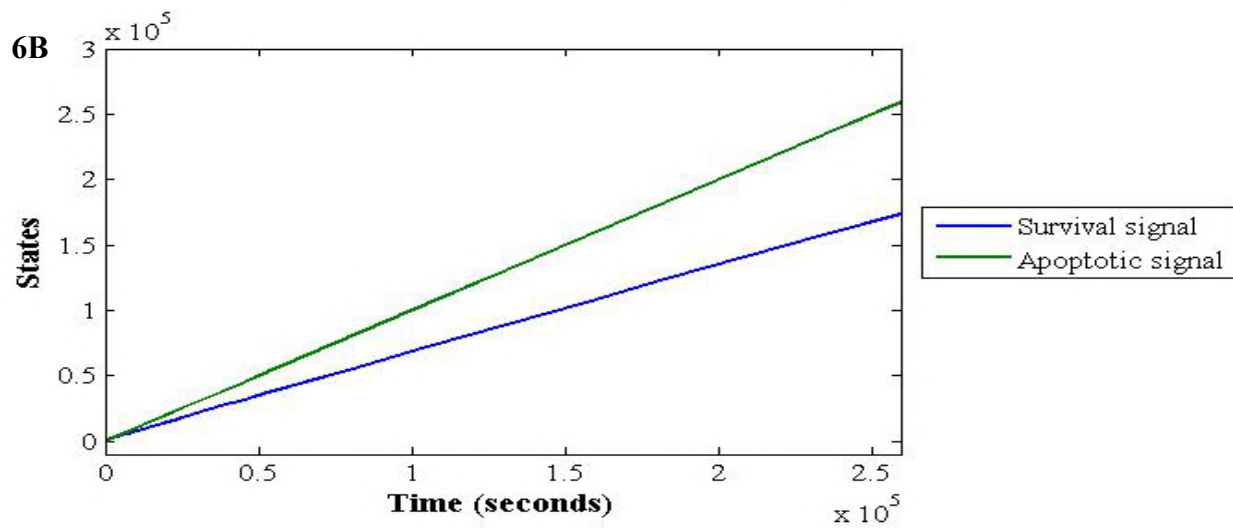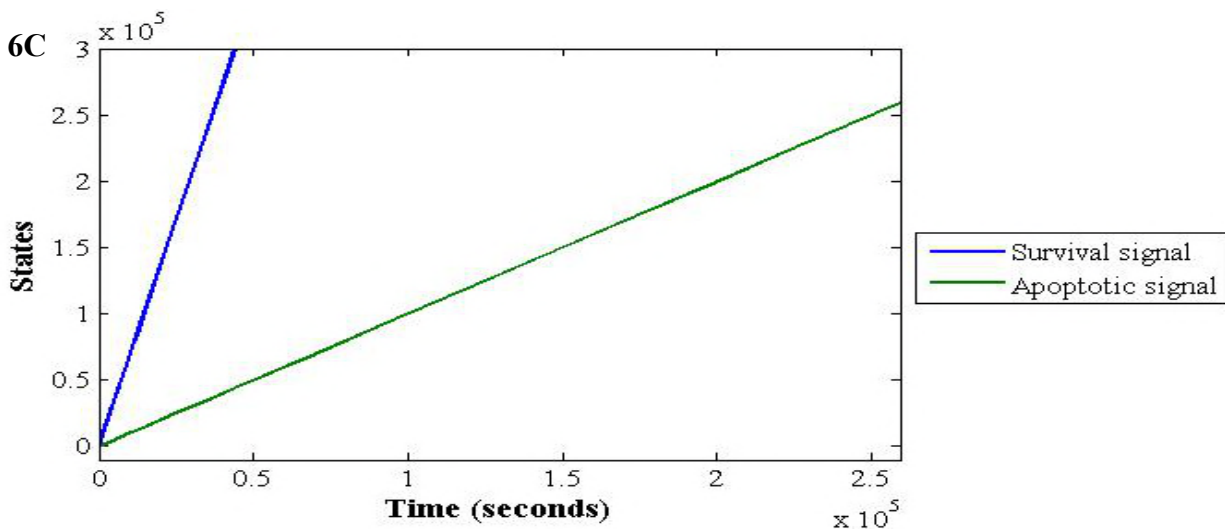

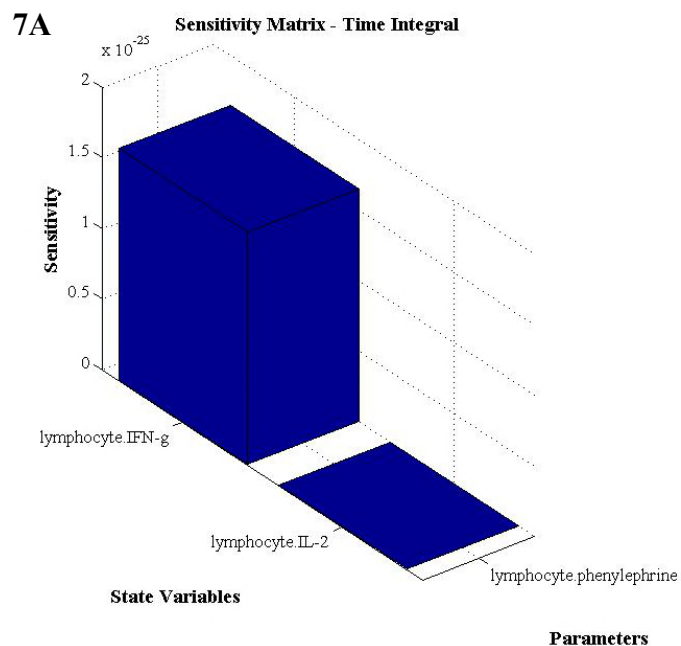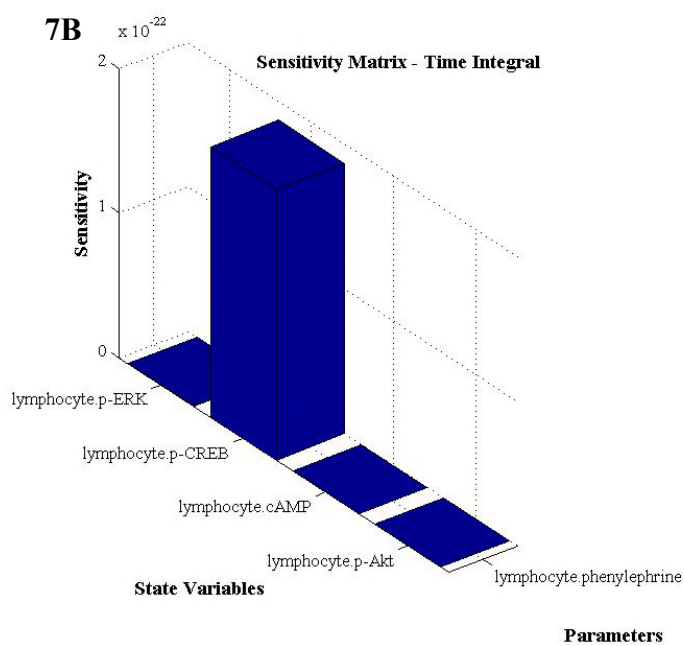

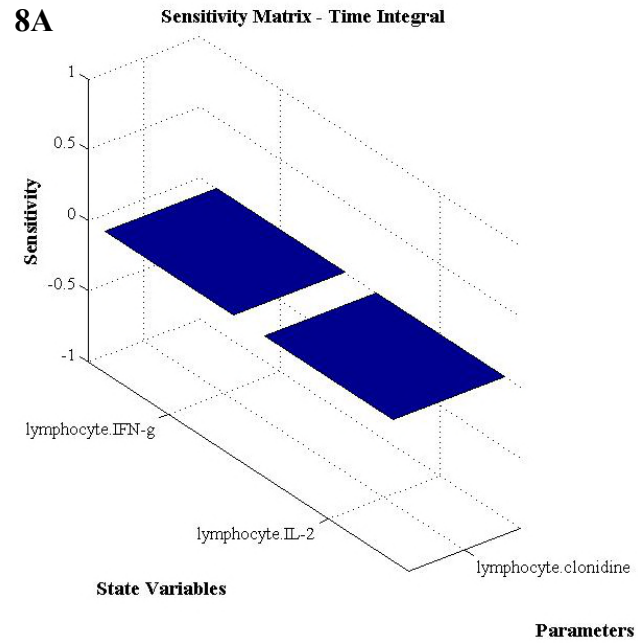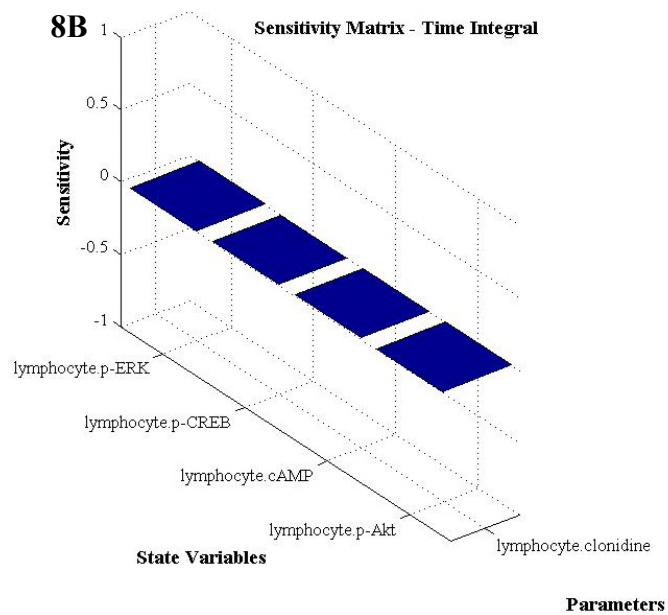

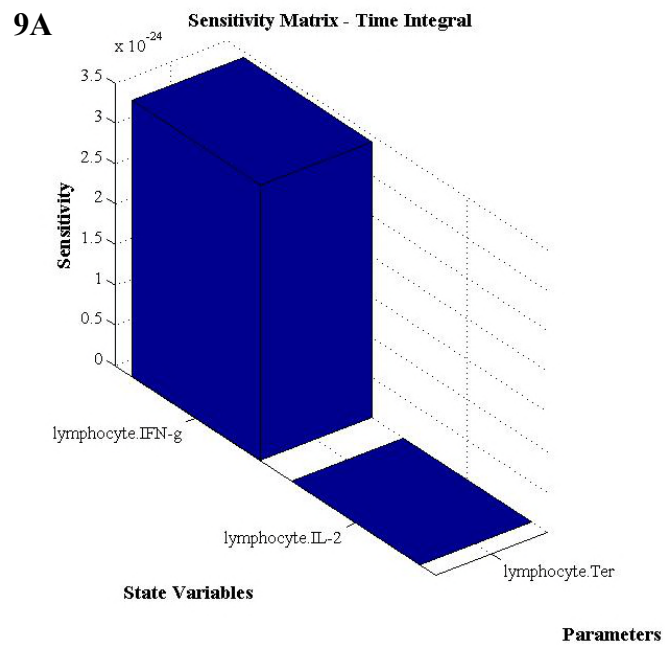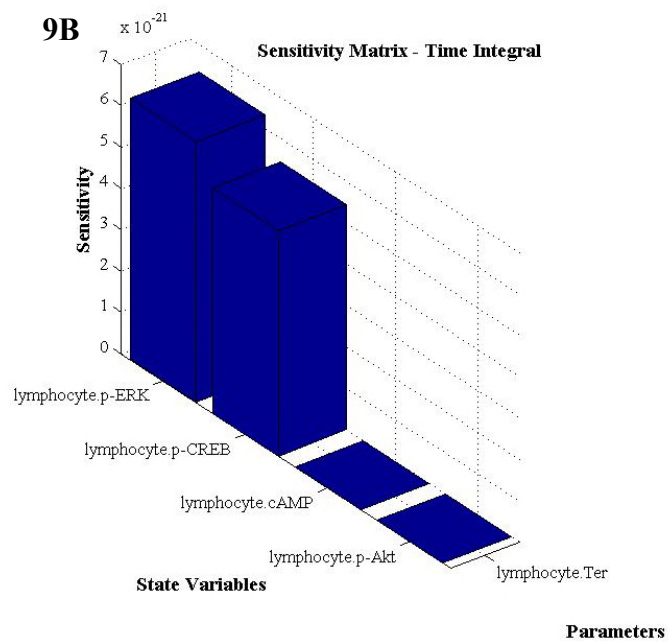

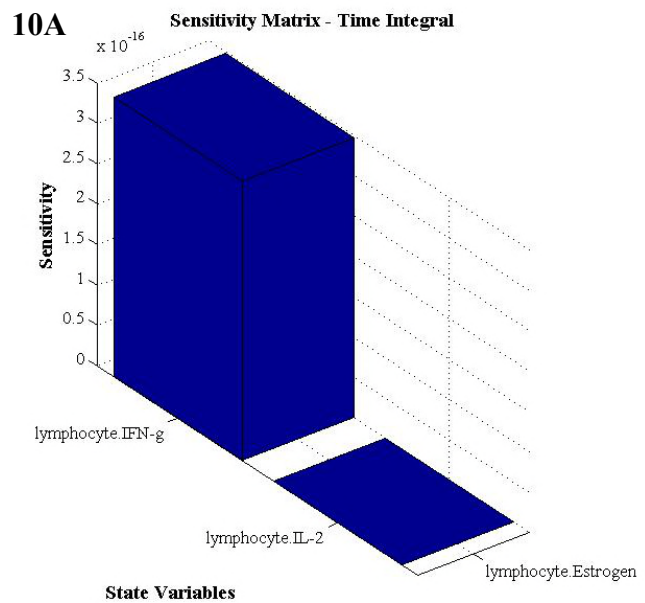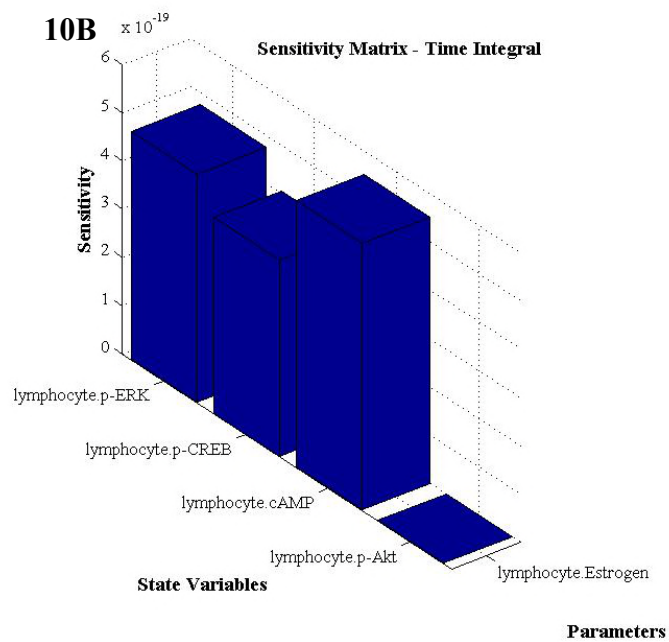



| 11A<br>Ligand  | Residues of ERK<br>that interact | Binding<br>energy<br>(Kcal/mol) | Ligand<br>efficiency | Inhibitor<br>constant |
|----------------|----------------------------------|---------------------------------|----------------------|-----------------------|
| Norepinephrine | Asp 147<br>Glu 69                | -5.02                           | -0.42                | 207.69 $\mu$ M        |

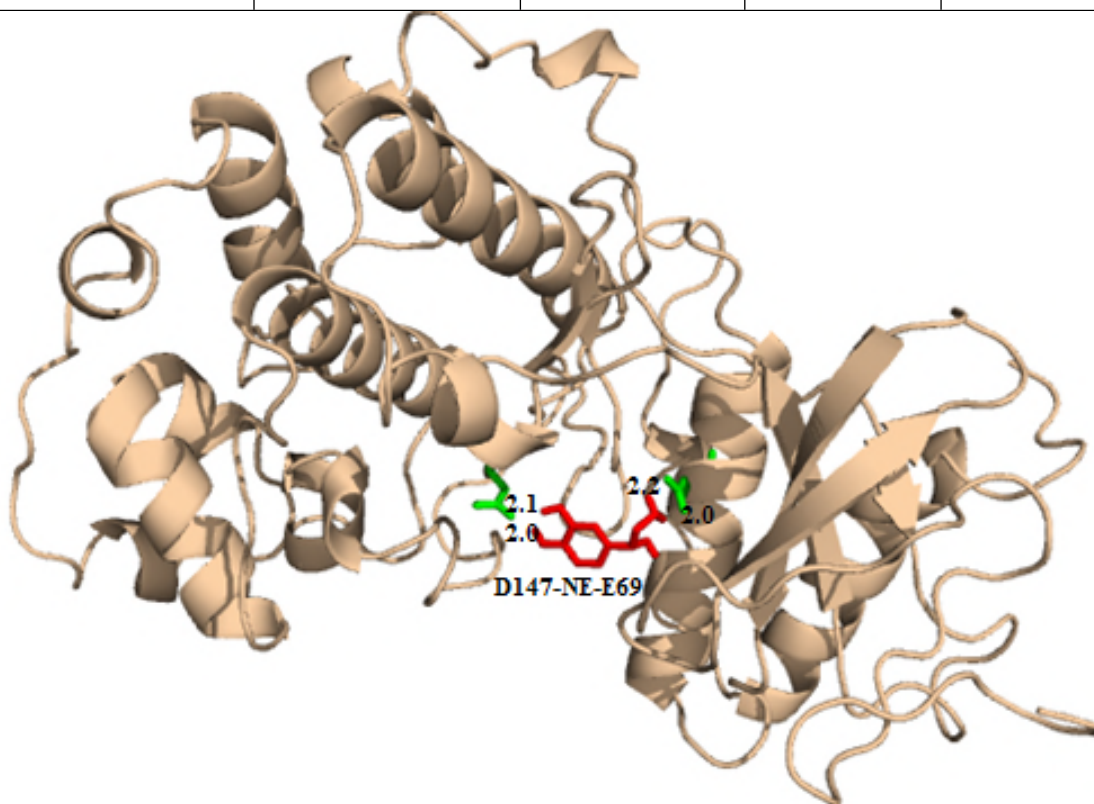

| <b>11B<br/>Ligand</b> | <b>Residues of ERK<br/>that interact</b> | <b>Binding<br/>energy<br/>(Kcal/mol)</b> | <b>Ligand<br/>efficiency</b> | <b>Inhibitor<br/>constant</b> |
|-----------------------|------------------------------------------|------------------------------------------|------------------------------|-------------------------------|
| <b>Norepinephrine</b> | His 178<br>Asp 177                       | -4.69                                    | -0.39                        | 365.7 $\mu$ M                 |

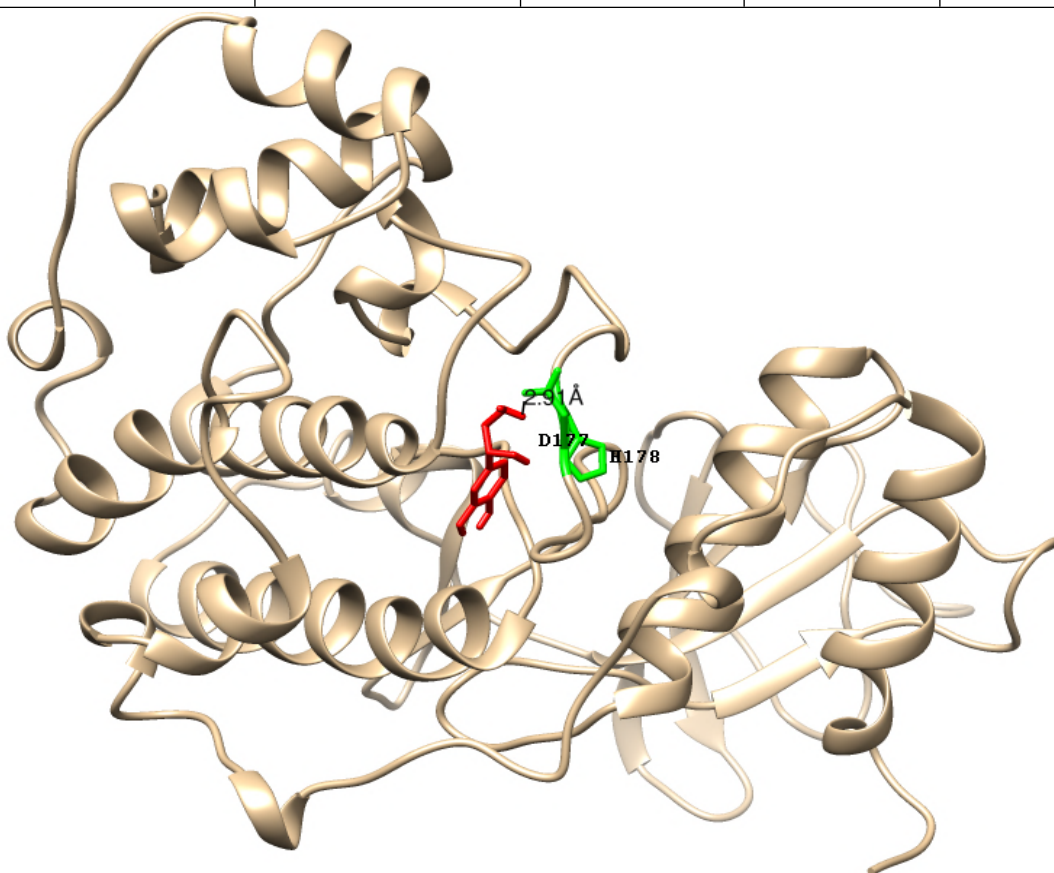

| 11C Ligand     | Residues of ERK that interact | Binding energy (Kcal/mol) | Ligand efficiency | Inhibitor constant |
|----------------|-------------------------------|---------------------------|-------------------|--------------------|
| Norepinephrine | Thr 179<br>Tyr 203            | -4.48                     | -0.37             | 523.7 $\mu$ M      |
|                | Tyr 203<br>Asp 177            | -4.47                     | -0.37             | 528.44 $\mu$ M     |

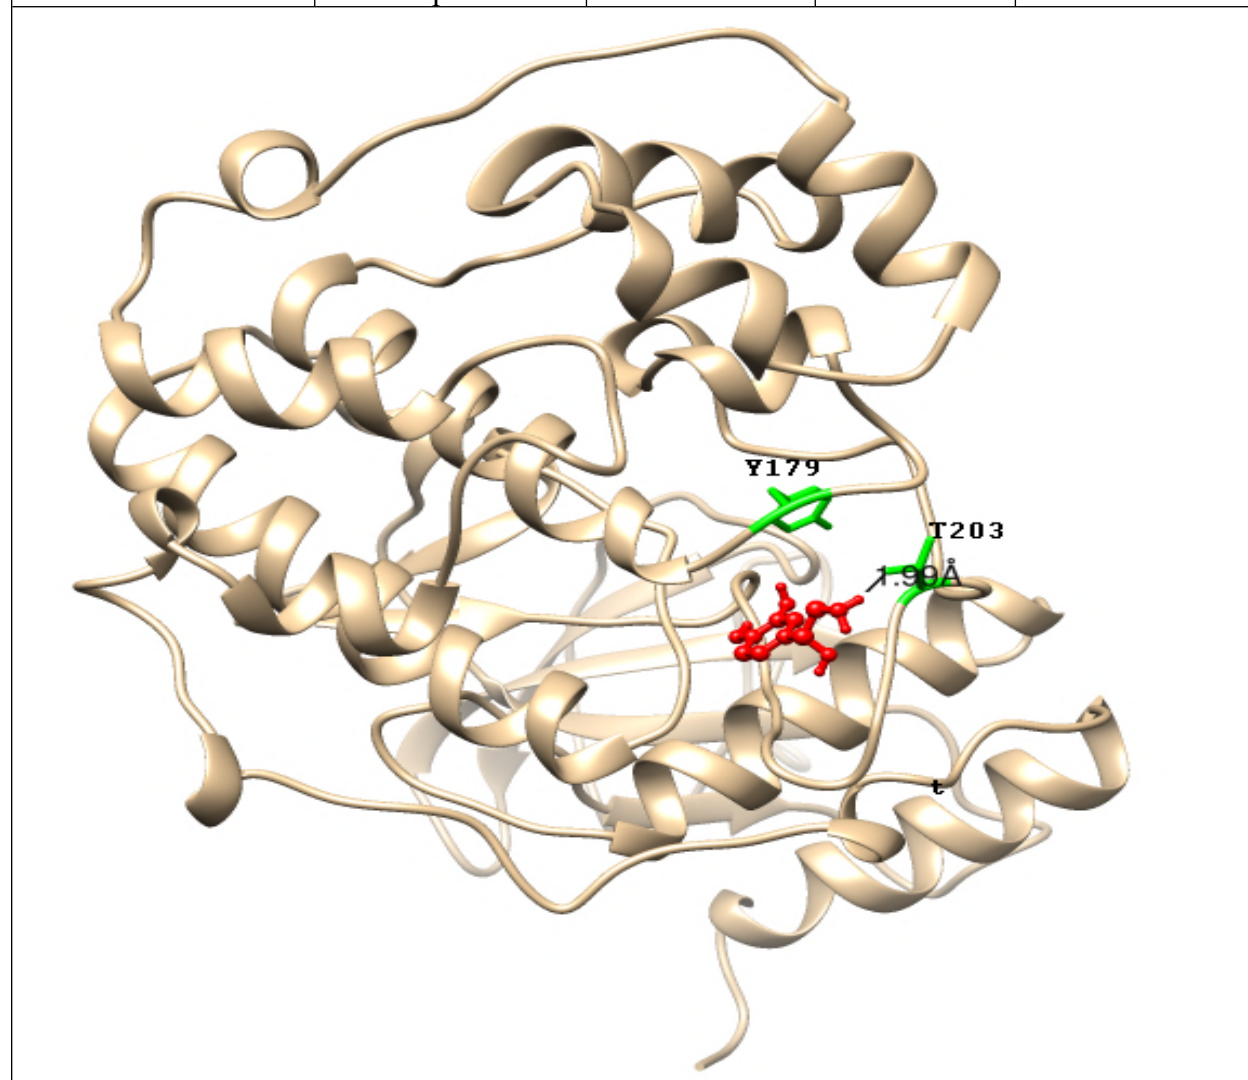

| 12A<br>Ligand         | Residues of $\beta$ 2-<br>AR that<br>interact | Binding<br>energy<br>(Kcal/mol) | Ligand<br>efficiency | Inhibitor constant |
|-----------------------|-----------------------------------------------|---------------------------------|----------------------|--------------------|
| 17 $\beta$ -estradiol | Asp 173                                       | -6.35                           | -0.32                | 22.09 $\mu$ M      |

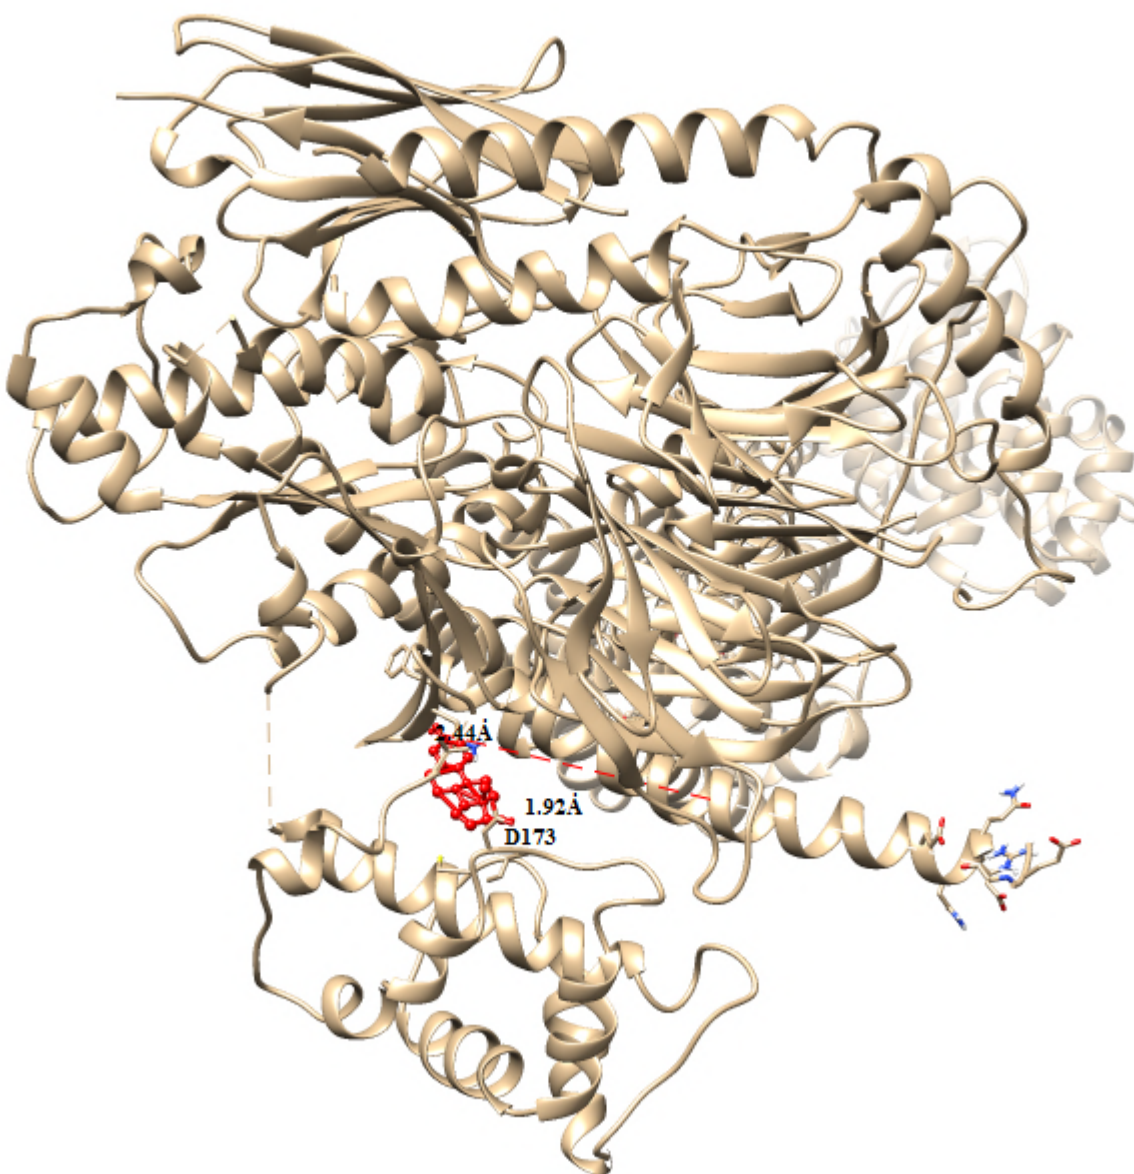

| <b>12B<br/>Ligand</b>                 | <b>Residues of <math>\beta</math>2-<br/>AR that interact</b> | <b>Binding<br/>energy<br/>(Kcal/mol)</b> | <b>Ligand<br/>efficiency</b> | <b>Inhibitor<br/>constant</b> |
|---------------------------------------|--------------------------------------------------------------|------------------------------------------|------------------------------|-------------------------------|
| <b>17<math>\beta</math>-estradiol</b> | Met 61                                                       | -6.76                                    | -0.34                        | 11.0 $\mu$ M                  |

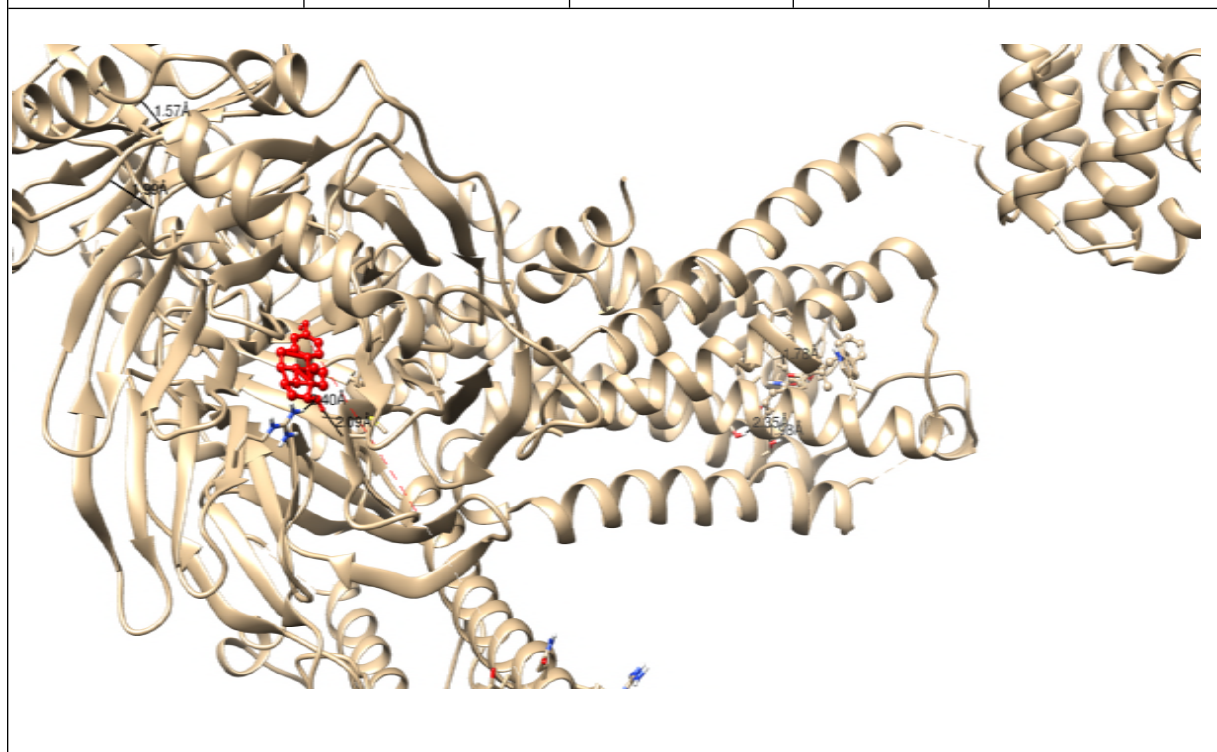

| <b>12C<br/>Ligand</b> | <b>Residues of <math>\beta</math>2-<br/>AR that interact</b> | <b>Binding<br/>energy<br/>(Kcal/mol)</b> | <b>Ligand<br/>efficiency</b> | <b>Inhibitor<br/>constant</b> |
|-----------------------|--------------------------------------------------------------|------------------------------------------|------------------------------|-------------------------------|
|-----------------------|--------------------------------------------------------------|------------------------------------------|------------------------------|-------------------------------|

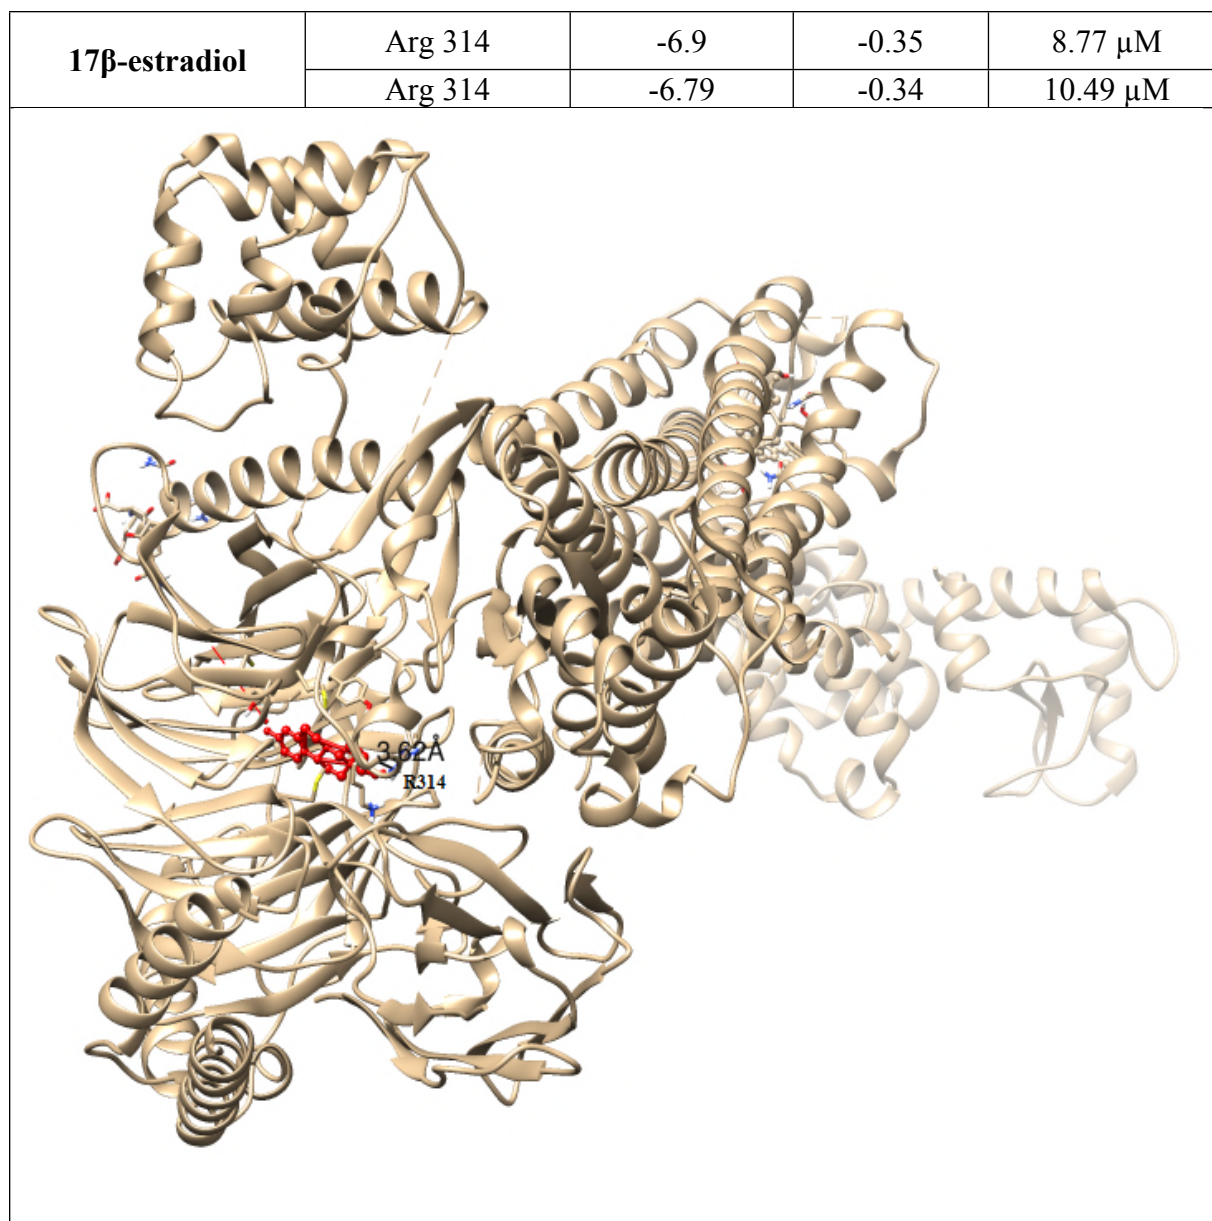

Source: https://www.biorxiv.org/content/10.1101/353185v1.full.pdf
